1 **Leave no stone unturned: The hidden potential of carbon and nitrogen cycling by novel, highly**  
2 **adapted *Thaumarchaeota* in the Atacama Desert hyperarid core**

3

4 **Running Title:** *Thaumarchaea* in the hyperarid core of the Atacama

5

6 Yunha Hwang<sup>1</sup>, Dirk Schulze-Makuch<sup>1\*</sup>, Felix L. Arens<sup>1</sup>, Johan S. Saenz<sup>3</sup>, Panagiotis S. Adam<sup>2</sup>,

7 Till L. V. Bornemann<sup>2</sup>, Alessandro Airo<sup>1</sup>, Michael Schloter<sup>3</sup>, Alexander J. Probst<sup>2\*</sup>

8 \*corresponding authors

9

10 **Affiliations:**

11 <sup>1</sup> Center of Astronomy & Astrophysics, Technical University Berlin, 10623, Berlin, Germany.

12 <sup>2</sup> Environmental Microbiology and Biotechnology, Department of Chemistry, University of  
13 Duisburg-Essen, 45141, Essen, Germany.

14 <sup>3</sup> Research Unit for Comparative Microbiome Analysis, Helmholtz Zentrum München, 85758,  
15 Oberschleißheim, Germany.

16

17 To whom the correspondence should be addressed:

18 alexander.probst@uni-due.de

19 schulze-makuch@tu-berlin.de

20

21 **Abstract**

22 The hyperarid core of the Atacama Desert is an extremely harsh environment previously thought  
23 to be colonized by only a few heterotrophic bacterial species. In addition, carbon and nitrogen  
24 cycling in these highly oligotrophic ecosystems are poorly understood. Here we genomically  
25 resolved a novel genus of *Thaumarchaeota*, *Ca. Nitrosodesertus*, found below boulders of the  
26 Atacama hyperarid core, and used comparative genomics to analyze their pangenome and site-  
27 specific adaptations. Their genomes contain genes for ammonia oxidation and the 3-  
28 hydroxypropionate/4-hydroxybutyrate carbon fixation pathway, indicating a  
29 chemolithoautotrophic lifestyle. *Ca. Nitrosodesertus* possesses the capacity for tolerating  
30 extensive environmental stress highlighted by the presence of genes against oxidative stress, DNA  
31 damage and genes for the formation of biofilms. These features are likely responsible for their  
32 dominance in samples with extremely low water content across three different boulder fields and  
33 eight different boulders. Genome-specific adaptations of the genomes included the presence of  
34 additional genes for UV resistance, heavy metal transporters, multiple types of ATP synthases,  
35 and divergent genes for aquaporins. Our results suggest that *Thaumarchaeota* mediate important  
36 carbon and nitrogen cycling in the hyperarid core of the Atacama and are part of its continuous  
37 and indigenous microbiome.

38

## Introduction

39 The surface soils in the hyperarid core (1) of the Atacama Desert are hostile environments  
40 characterized by extreme desiccation (water content < 1% by weight), high salt content resulting  
41 in low water activity, and high UV irradiation ( $\sim 30 \text{ J}\cdot\text{m}^{-2}$ ) (2). Scarce amounts of DNA from these  
42 soils have been analyzed in previous studies (2–4) revealing sparse microbial communities with  
43 low diversity, dominated by *Actinobacteria* and *Firmicutes*. While these previous studies showed  
44 that some of these microbes are likely alive and possibly active, as indicated by cultivation  
45 experiments (3) and *in-situ* replication measures [iRep; (5)] (2), very little is known about the  
46 carbon and nitrogen cycling in the hyperarid soils of the Atacama Desert. To date, only localized  
47 carbon fixation could be inferred from the findings of hypolithic and endolithic cyanobacteria  
48 (6,7), but no information on possible pathways for the transformation of other nutrients has been  
49 obtained so far. A recent study (8) of playas and alluvial fans located outside the hyperarid core  
50 reported the presence of Thaumarchaeal 16S rRNA sequences in the subsurface after a heavy rain  
51 event (40-90 mm) in 2015. However, without the genome-level information, Thaumarchaeal  
52 metabolic capability and contribution to the overall prokaryotic community could not be resolved  
53 in this study.

54

55 *Thaumarchaeota* mediate important environmental processes in both marine and terrestrial  
56 ecosystems and are particularly adapted to oligotrophic environments with their highly energy-  
57 efficient carbon fixation pathway (9,10). *Thaumarchaeota* have also been found in hot desert soils  
58 (e.g. Mojave Desert, California and Chihuahuan Desert, New Mexico) (11). However, most in-  
59 depth desert microbiome studies focus on bacterial communities (12,13) and multiple studies have  
60 reported decreasing archaeal diversity with increasing aridity (14,15). The general pattern of lower

61 tolerance of *Archaea* to hyperaridity was supported by the absence of *Archaea* in other hyperarid  
62 environments such as the McMurdo Dry Valleys, Antarctica (12,16). The soil microbiome of the  
63 Atacama Desert has previously been thought to be dominated by *Bacteria*, with an exception of  
64 halophilic *Archaea* (*Halobacteriales*) in less arid locations such as coastal soils (2) and salt crusts  
65 (17). To our knowledge, previous molecular based studies of the hyperarid core revealed no  
66 evidence of *Archaea* and consequently, their adaptations and ecological roles in arid to hyperarid  
67 environments have not yet been studied.

68  
69 The Atacama Desert hyperarid core harbors many expansive boulder fields (18–20) where  
70 individual boulders have been exposed for up to 37 millions of years (21,22) and transported by  
71 seismic activity. Despite the unique environments that the soils under the boulders present and the  
72 ubiquitousness of boulders in the Atacama Desert, no study has determined the microbial and  
73 geochemical composition below the boulders. In order to understand these uniquely protected  
74 hyperarid soils below the boulders that could harbor microbes playing a key role in carbon and  
75 nitrogen cycling in the Atacama Desert, we performed genome-resolved metagenomics of samples  
76 from the surface soil below the boulders and compared them to samples beside the boulders.  
77 Community structure and metabolic functions were interpreted in conjunction with geochemical  
78 measurements. *Thaumarchaeota* were revealed to be one of the key organisms differentiating  
79 microbial communities inhabiting below and beside boulders. Consequently, Thaumarchaeal  
80 genomes were selected for an in-depth pangenomic analysis to reveal adaptations to environmental  
81 stress and potential for carbon and nitrogen cycling. We investigated how *Thaumarchaeota*  
82 evolved in these uniquely protected, sparsely populated, and constantly selective environments.

83 **Material and methods**

84 ***Sampling location and procedure.*** Sampling was conducted in March 2019, in a dry period with  
85 the last recorded rain event occurring in June 2017 in the Yungay region . Three sampling sites,  
86 Yungay (Y), Maria Elena (M), and Lomas Bayas (L), were chosen based on a previous study (2)  
87 that identified inland hyperarid sites using the threshold of water content <1% by weight (**Figure**  
88 **1a**). The coordinates of the three sample sites can be found in **Table S1**. Sampling was  
89 conducted in previously described characteristic boulder fields (18,19). At each boulder field, six  
90 boulders of diameter ~50 cm and height ~20 cm were chosen within a radius of ~100 m from  
91 each other. For each boulder, two types of samples were taken, one below boulder (B) and one  
92 control sample (C) in the open soil ~10 cm away from the boulder. All chosen boulders were  
93 well distanced from other boulders to make sure that the control samples were not constantly  
94 shadowed by other boulders or the sampled boulder itself. Samples were taken aseptically using  
95 precautions such as wearing a mask and sampling in upwind direction. New gloves were used for  
96 each sample, metal spatulas were previously autoclaved in aluminum foil, and newly unfoiled  
97 spatulas were used to scoop the topsoil (~0.5 cm) into sterile 50 ml falcon tubes, which were  
98 then flash frozen in a liquid nitrogen dry shipper within half an hour of sampling. Control soil  
99 samples were taken first and then boulders were flipped over to sample below boulder soil as  
100 soon as possible to avoid aerial contamination. Additional samples were taken for geochemical  
101 analyses with a small shovel into a PE-sample bag (Whirl-Pak®, WI, USA) which were then  
102 stored at room temperature in the dark. See **Supplementary Materials and Methods M1** for  
103 additional field measurements.

104  
105 ***Geochemical and mineralogical analysis.*** Detailed methods for pH and electrical conductivity,  
106 anion and cation analysis, total organic carbon analysis and bulk mineralogy can be found in the

107 **Supplementary Materials and Methods M2-5.**

108

109 *DNA extraction, Illumina library preparation and sequencing* are presented in the  
110 **Supplementary Materials and Methods M6.**

111 *Metagenomic analysis, binning and annotation.* Out of 24 attempted DNA extractions (**Table**  
112 **S2, Figure S1**), 15 yielded measurable amounts of DNA due to extremely low DNA content. Of  
113 those, eleven DNA extracts successfully yielded metagenomic libraries and subsequent  
114 metagenomic analyses were performed. For detailed methods on assembly, binning and annotation  
115 see **Supplementary Materials and Methods M7.**

116

117 *Community analysis based on metagenomics.* Operational taxonomic units (OTUs) were  
118 determined by extracting all S3 ribosomal proteins (rPS3) using hmmsearch (HMMER 3.2.1,  
119 <http://hmmer.org/>) across all assembled metagenomes. Retrieved rpS3 amino acid sequences were  
120 clustered using USEARCH (23) at 99% identity (24) and centroid sequences were extracted.  
121 Coverages of OTUs across all samples were calculated by mapping reads from each sample to the  
122 scaffolds of the centroids using Bowtie2 in sensitive mode (25) and filtering for a maximum of 5  
123 mismatches (2% error rate) in both reads in each read pair. Coverages were then normalized by  
124 the total number of reads per sample. OTUs were placed into a phylogenetic tree by aligning using  
125 MUSCLE (26), alignment trimming using BMGE (BLOSUM30) (27) in default mode, and tree  
126 construction using iqtree v1.3.11.1 (28) with flags -m TEST -alrt 1000 -bb 1000. The phylogenetic  
127 tree was visualized using iTOL (29). Shannon-Wiener Indices were calculated using the Vegan  
128 package (30) in R (31). ANOVA (34) analysis was conducted in R (31). Bray-Curtis (32) distance  
129 matrices were calculated for Principal coordinate analyses (PCoA), Non-metric multidimensional

130 scaling (NMDS), BioENV(33), and Multiple response permutation procedures (MRPP,  
131 permutation=999) (35), which were subsequently visualized in R (31).

132

133 ***Phylogenomic analysis.*** Phylogenomic placements of the Thaumarchaeal metagenome-assembled  
134 genomes (MAGs) were determined using a supermatrix of 37 single-copy marker genes with all  
135 NCBI genomes annotated as *Thaumarchaeota* as of 4/6/2020 (36). The fact that the  
136 *Thaumarchaeota* classification on NCBI includes the newly reclassified phylum *Aigarchaeota*  
137 (Hua et al. 2018) allowed us to use the latter as an outgroup. CheckM (37) was used to quality  
138 filter genomes with thresholds <5% contamination, >50% completeness. Two local databases were  
139 created from the Atacama Desert and NCBI Thaumarchaeota MAGs (**Table S13**) respectively,  
140 against which homology searches were performed with HMMER 3.2.1 (<http://hmmer.org/>) using  
141 the HMM profiles for the Phylosift marker genes (36) with a cutoff of 1E-5. The resulting datasets  
142 were aligned with MUSCLE with default parameters (26) and curated manually to fuse contiguous  
143 fragmented sequences and remove extra gene copies. Ultimately, two genomes (GCA\_011605725,  
144 GCA\_011773305) were removed entirely, since they contained multiple sequences that were too  
145 distant from both *Thaumarchaeota* and *Aigarchaeota*. The resulting datasets were realigned as  
146 above, trimmed with BMGE (BLOSUM30) (27), and concatenated into a supermatrix of 312  
147 operational taxonomic units (OTUs) and 7426 positions. Phylogenies were reconstructed with IQ-  
148 TREE 2 (28); first a tree with ModelFinder (38) (-m MFP -bb 1000 -alrt 1000 -abayes) that served  
149 as guide tree for a run with the PMSF model (39) (-m LG+C60+F+G -bb 1000 -alrt 1000 -abayes).  
150 As per the suggestion of the IQ-TREE authors, we considered those branches strongly supported  
151 with at least 95 for ultrafast bootstrap (40) and 80 for the SH-aLRT test (41).

152

153 **Comparative genomics.** The predicted protein sequences of eight NCBI *Ca. Nitrosocosmicus*  
154 reference genomes (**Table S3**) were compared with the recovered Thaumarchaeal MAGs. The  
155 CompareM package ([github.com/dparks1134/CompareM](https://github.com/dparks1134/CompareM)) was used to identify the orthologous  
156 fraction (OF) and calculate the average amino acid identity (AAI) of orthologous genes between a  
157 pair of genomes, and fastANI (42) was used to calculate the average nucleotide identity between  
158 genomes using default parameters. OrthoVenn2 (43) was used to identify and visualize  
159 orthologous clusters across genomes.

160

161 **Data availability.** All sequencing data will be submitted to SRA and genomes will be made  
162 publicly available through NCBI.



163

## Results and Discussion

164 *Hyperarid soils sheltered under the boulders are geochemically distinct and organic carbon*

165 *deficient.* As previously documented (18–20,44), a substantial part of the Atacama Desert

166 hyperarid core features expansive boulder fields, where the topsoil is covered by boulder-sized

167 clasts (**Figure 1, Figure S4**). Soils below the boulders experience lower diurnal temperature and

168 relative humidity fluctuations than soils beside the boulders (**Figure S2a-c**). Based on the dew

169 point temperature calculations, we showed that the condensation of water in the morning hours is

170 far less likely for soil below boulders compared to soil beside boulders (**Figure S2d-f**), suggesting

171 that water content below boulders may be even lower than previously studied Atacama Desert

172 hyperarid top soils (~0.2% by weight) (2).

173 We compared soil samples of two sample types: soils taken below boulders (B) and soils

174 taken adjacent to the boulder (control, C), at three different sampling locations (Lomas Bayas, L;

175 Maria Elena, M; Yungay Valley, Y) (**Figure 1a**). While the collected soils were mineralogically

176 very similar with some variation with sampling location (**Figure S3**), their ion concentrations

177 showed large variance between boulder fields, individual boulders, and sample types.

178 Interestingly, B samples clustered based on their sampling location, while C clustered independent

179 of sampling sites (**Figure 1b**). In general, samples from locations L and M were enriched in F<sup>-</sup>,

180 while Y samples were enriched in PO<sub>4</sub><sup>3-</sup>, SO<sub>4</sub><sup>2-</sup>, Mn<sup>2+</sup> and Ca<sup>2+</sup>, suggesting boulder field specific

181 patterns of ion concentrations. More sampling location dependent ion composition patterns

182 amongst the B samples indicate that soils below the boulder are sheltered from external input of

183 ion species (i.e. atmospheric deposition), thereby exhibiting a more representative ion composition

184 patterns of the soils in the area beyond the topsoil. When comparing the B and C sample of each

185 individual boulder, nitrate and magnesium ion concentrations were significantly lower in B

186 samples compared to C samples (paired t-test; NO<sub>3</sub><sup>-</sup>: t(8) = -3.9, p-value = 0.0451, Mg<sup>2+</sup>: t(8) = -

187 2.33, p-value = 0.0484, **Figure S5**). Total Organic Carbon (TOC) concentrations were at or below  
188 detectable levels (**Figure S6**) in both below boulder and beside boulder samples. Our results show  
189 that the soils below the boulders are not only hyperarid and organic carbon deficient, but also  
190 sheltered from the atmospheric input of both water (e.g. fog, dew) and ion species.

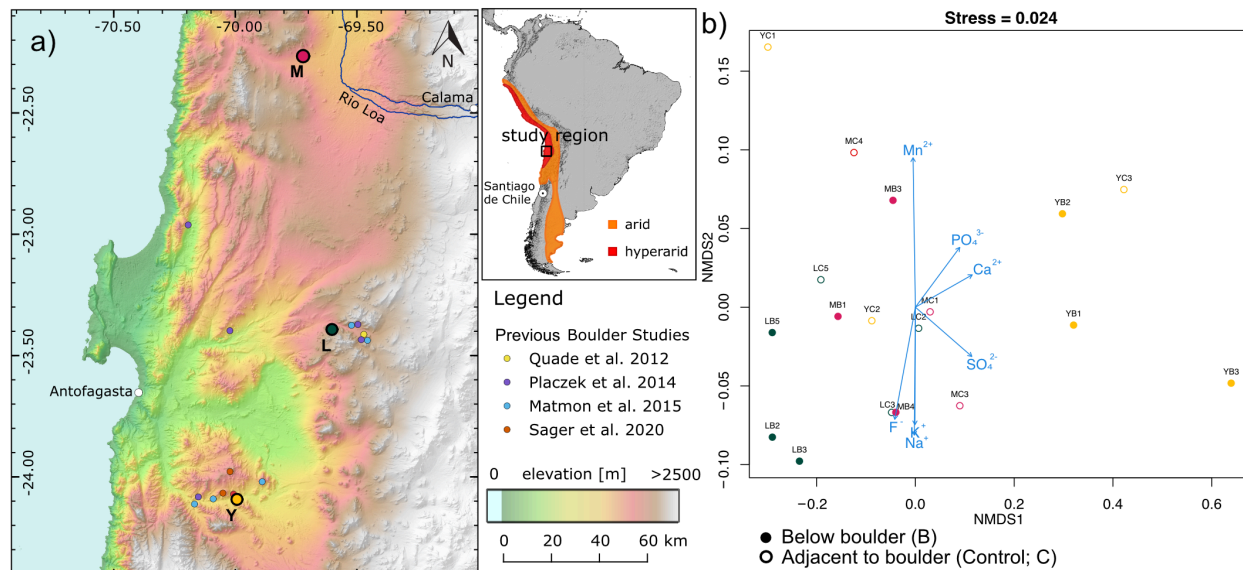

191 **Figure 1. Sampling location and soil geochemistry.** a) Location of three sampling sites and  
192 their abbreviations in parentheses b) Non-metric multidimensional scaling (NMDS) ordination of  
193 anion and cation concentrations in each soil sample. Different colors represent different sampling  
194 sites (Green = L, Red = M, Yellow = Y). Filled vs unfilled data points correspond to the sample  
195 type information. Blue vectors represent fitted ion species onto the ordination with a p-value less  
196 than 0.1.  
197

198

199 *An actively replicating microbial community in the Atacama Desert hyperarid core.* We  
200 investigated the eleven successfully prepared metagenomes (for details see Material and Methods  
201 and **Table S4**): three below boulder and three control samples came from Lomas Bayas (LB2,  
202 LB3, LB5 and LC2, LC3, LC5), three samples below boulder were from Maria Elena (MB1, MB3,  
203 MB4) and two below boulder samples from Yungay Valley (YB1, YB3).

204 Genome-resolved metagenomics of these eleven samples yielded 73 high quality (>75%  
205 completeness, <15% contamination) metagenome-assembled genomes (MAGs), of which 71  
206 belonged to only three different phyla, reflecting the limited diversity of this extreme ecosystem.  
207 Eight of these high quality genomes were Thaumarchaeal with completeness ranging from 84.67  
208 to 98.54% and contamination below 10% (**Table S4**). Other high quality MAGs belonged to  
209 *Actinobacteria* (n=34), *Chloroflexi* (n=29), *Firmicutes* (n=1), *Alphaproteobacteria* (n=1). *In situ*  
210 replication measures [iRep, (5)] were successfully calculated for 32 out of all high-quality bacterial  
211 genomes (n=65), indicating an active metabolism of the majority of the indexed population  
212 (calculated iRep values of 32 genomes ranged between 1.34 and 3.47, mean: 1.98). On average,  
213 genomes recovered from below boulder metagenomes were associated with higher iRep values  
214 than the control metagenomes (p-value < 0.04, Welch's t-test, **Figure S7**). A full overview of  
215 genome statistics, their taxonomic classification and corresponding iRep values is provided in  
216 **Table S4**.

217

218 *Atacama soils below boulders harbor unique microbial communities with high shares of*  
219 *Thaumarchaeota.* We detected 147 different *Bacteria* and *Archaea* based on clustering of S3  
220 ribosomal proteins (rpS3, 99% identity, **Table S5, Figure S8**). Shannon indices showed higher  
221 variation in alpha diversity for below boulder samples compared to control samples (**Figure S9**).

222 Principal Coordinate Analysis (PCoA) of the communities (**Figure S10a**) demonstrated clustering  
223 of samples based on the sample site (L, M, Y) as well as the sample type (B, C). This was  
224 corroborated by the Multiple Response Permutation Procedure (MRPP) indicating significant  
225 influence on the community structure by both sampling location (chance corrected within group  
226 agreement  $A = 0.2648$ , significance of delta = 0.001) and sample type ( $A = 0.1488$ , significance  
227 of delta = 0.002). Using BioENV (33), we identified  $F^-$  concentration to be most correlated  
228 (correlation = 0.573) with the community composition. Additionally, we conducted a NMDS  
229 analysis (**Figure S10b**), identifying additional ions ( $Ca^{2+}$ ,  $SO_4^{2-}$ ,  $K^+$ ,  $Cl^-$ ) that could be correlated  
230 with the community composition.

231 Out of the 147 different taxa, 33 were identified to be significantly different in their  
232 abundances (ANOVA (34) p-value < 0.05) between B and C samples (**Table S6**). Such taxa  
233 included *Actinobacteria* (belonging to *Cryptosporangiaceae*, *Streptomyetaceae*, and  
234 *Geodermatophilaceae*), as well as one *Alphaproteobacteria* (*Acetobacteraceae*). These taxa were  
235 particularly abundant in control samples and near absent in below boulder samples, suggesting  
236 specific and unknown selection processes for the two different sample types. Alternatively, some  
237 of these taxa may be deposited through aeolian transport (45). **Figure 2** shows the phylogenetic  
238 relationship between the top 30 most abundant taxa across the samples based on rpS3 proteins and  
239 links them to their respective MAGs as well as their differential coverage across the samples. We  
240 conclude that below boulder (B) and beside boulder (C) present substantially different habitats of  
241 the same ecosystem.

242 One *Thaumarchaeal* OTU was the only taxon based on ANOVA (34) (p-value = 0.0396)  
243 with a higher abundance below boulders and near absence in control samples. All eight below  
244 boulder metagenomes contained high abundances of *Thaumarchaeota*. Based on the ranked

245 abundance of ribosomal protein S3 (rpS3) gene coverages, *Thaumarchaeota* ranked amongst the  
246 top seven most abundant taxa across all below boulder samples. In three samples (MB3, MB4,  
247 LB5), *Thaumarchaeota* were the most abundant organisms, e.g. in LB5, *Thaumarchaeota* were 4-  
248 fold more abundant than the second most abundant taxon. The abundance of *Thaumarchaeota*  
249 under boulders and their near absence in the nearby irradiated soil support the previous findings  
250 from marine environments (10,46) where surface waters harbored lower abundances of  
251 *Thaumarchaeota*. Photoinhibition of ammonia oxidation in ammonia oxidizing archaea (AOA)  
252 (47) has previously been hypothesized as the cause, along with other proposed hypotheses, such  
253 as increased competition (48,49) and indirect photoinhibition by Reactive Oxygen Species (ROS),  
254 such as hydrogen peroxide (50). To date, the underlying reason for the lower abundance of  
255 *Thaumarchaeota* in highly irradiated environments remains inconclusive. Based on the low  
256 amounts of DNA recovered from most control samples (< 1.14 ng / g soil), we conclude that the  
257 near absence of *Thaumarchaeota* in the open irradiated top soils is likely not due to increased  
258 competition, at least at our study sites. Photochemically produced ROS (H<sub>2</sub>O<sub>2</sub> and metal  
259 superoxides and peroxides) have previously been found to accumulate in the Atacama Desert  
260 (Yungay site) top soils at levels an order of magnitude higher than in non-arid control soils (51).  
261 Additionally, in contrast to ocean environments, UV and photoradiation do not penetrate into the  
262 soil beyond the very surface of the topsoil and with minimal soil turbation in the Atacama, we  
263 expect the effect of UV and photoradiation inhibition reaching below the top ~ 0.5 cm of soil  
264 unlikely. Therefore, we hypothesize the inhibition of high ROS levels (50) to be the main reason  
265 why *Thaumarchaeota* are not abundant in the control samples despite their potential desiccation  
266 tolerance.

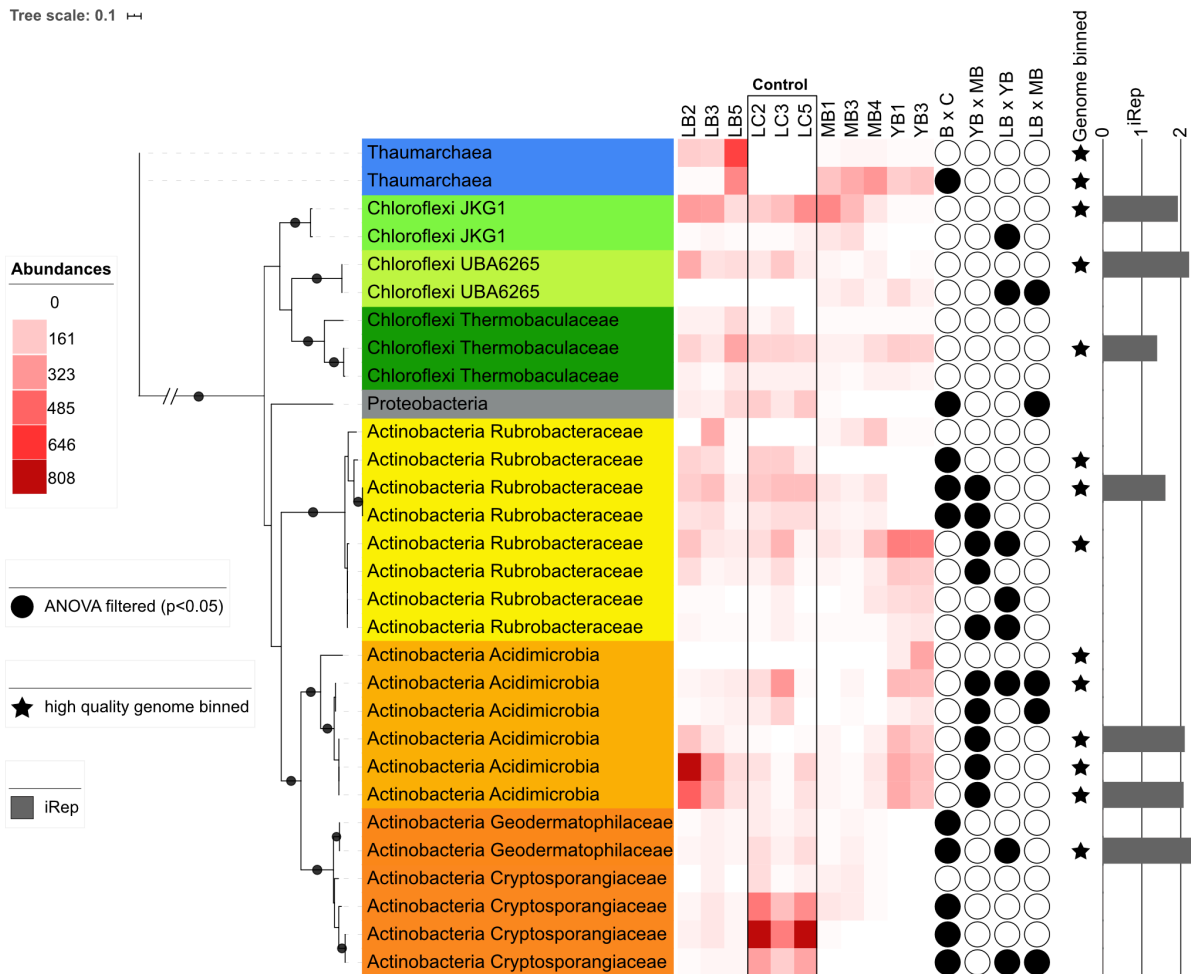

267

268 **Figure 2. Phylogenetic tree of 30 most abundant taxa (rps3 clusters) out of 147 and their**

269 **normalized abundances across all samples.** Filled stars represent successful binning of the OTU

270 in high quality genomes and red bars indicate iRep values calculated for the high quality genomes.

271 Strongly supported branches as described in the M&M section are indicated with black dots.

272

273

274 ***Ammonia Oxidizing Thaumarchaeota occupy an important niche in the Atacama Desert carbon***  
275 ***and nitrogen cycling.*** Normalized abundance of key marker genes in the assembled metagenomes  
276 revealed potential for C1 metabolism (**Figure 3, Table S7-8**), complex carbon degradation, and  
277 fermentation across all samples. Three carbon fixation pathways (3-hydroxypropionate cycle,  
278 3HP/4HB, CBB cycle) were detected however, abundances of each marker gene varied with site.  
279 No 3HP/4HB cycle was found in control samples, while the 3-hydroxypropionate cycle was found  
280 in low abundance in MB and YB samples. Significant gaps in the potential for nitrogen cycling  
281 were observed. Nitrile hydratases were found across all samples, and archaeal ammonia oxidation  
282 potential was only found in below boulder samples (with the exception of YB1). No potential for  
283 nitrogen fixation, nitrate-, and nitric oxide reduction as well as nitrite oxidation were identified.  
284 The lack of nitrogen fixation and denitrification genes suggest low overall biological input and  
285 little loss of biologically available nitrogen. Although the investigated soils are known to be  
286 enriched in nitrates (particularly at ~1m depth) that have accumulated over millions of years  
287 through abiotic processes (e.g. atmospheric formation through lightning followed by dry  
288 deposition and rainwater infiltration) (52), below boulder nitrate concentrations are significantly  
289 lower (**Figure S5**), likely due a combined effects of highly microbial activity and lack of  
290 atmospheric or hydrologic input. Therefore, we propose that nitrogen cycling below boulders is  
291 largely controlled by microbial activity. Specifically, we suggest a highly equilibrated nitrogen  
292 cycle with *Thaumarchaeota* nitrifying ammonia produced through protein ammonification  
293 performed by diverse *Chloroflexi* and *Actinobacteria* (**Table S9**) in these below boulder  
294 environments.

295         Resolving the metabolic potential at the genomic level delineated the role each taxonomic  
296 group plays in this highly streamlined community. Presence and absence of key metabolic genes

297 for each high quality genome are shown in **Figure 3b**. Our analysis shows that although all samples  
298 show carbon fixation potential, taxa capable of fixing carbon are limited to *Thaumarchaeota*  
299 (through the 3HP/4HB pathway) and some *Rubrobacteraceae* (3-hydroxypropionate pathway).  
300 Surprisingly, only one Form I Rubisco could be binned to a high quality *Rubrobacteraceae*  
301 genome, despite a stronger signal seen in the metagenomes. Chloroflexi genomes associated with  
302 the lineage *JKGI* had the broadest potential of degrading complex carbon and were capable of a  
303 fermentative lifestyle, while *Actinobacteria* could metabolize a wider range of C1 substrates.  
304 Nitrite reduction potential detected in below boulder sites was constrained to the nirK genes found  
305 in *Thaumarchaeota*. NirK in *Thaumarchaeota* has been hypothesized to play a key role in  
306 ammonia oxidation (53), and is biochemically capable of transforming N compounds to produce  
307 nitric oxide (54). However, whether it also denitrifies organic nitrite leading to a loss of organic N  
308 in a natural environment remains to be confirmed. Genome-resolved metabolic predictions  
309 revealed conserved metabolic capacities across genomes that belong in the same taxonomic family,  
310 with *Thaumarchaeota* playing a unique role in the nitrogen and carbon cycling in the Atacama  
311 hyperarid core.



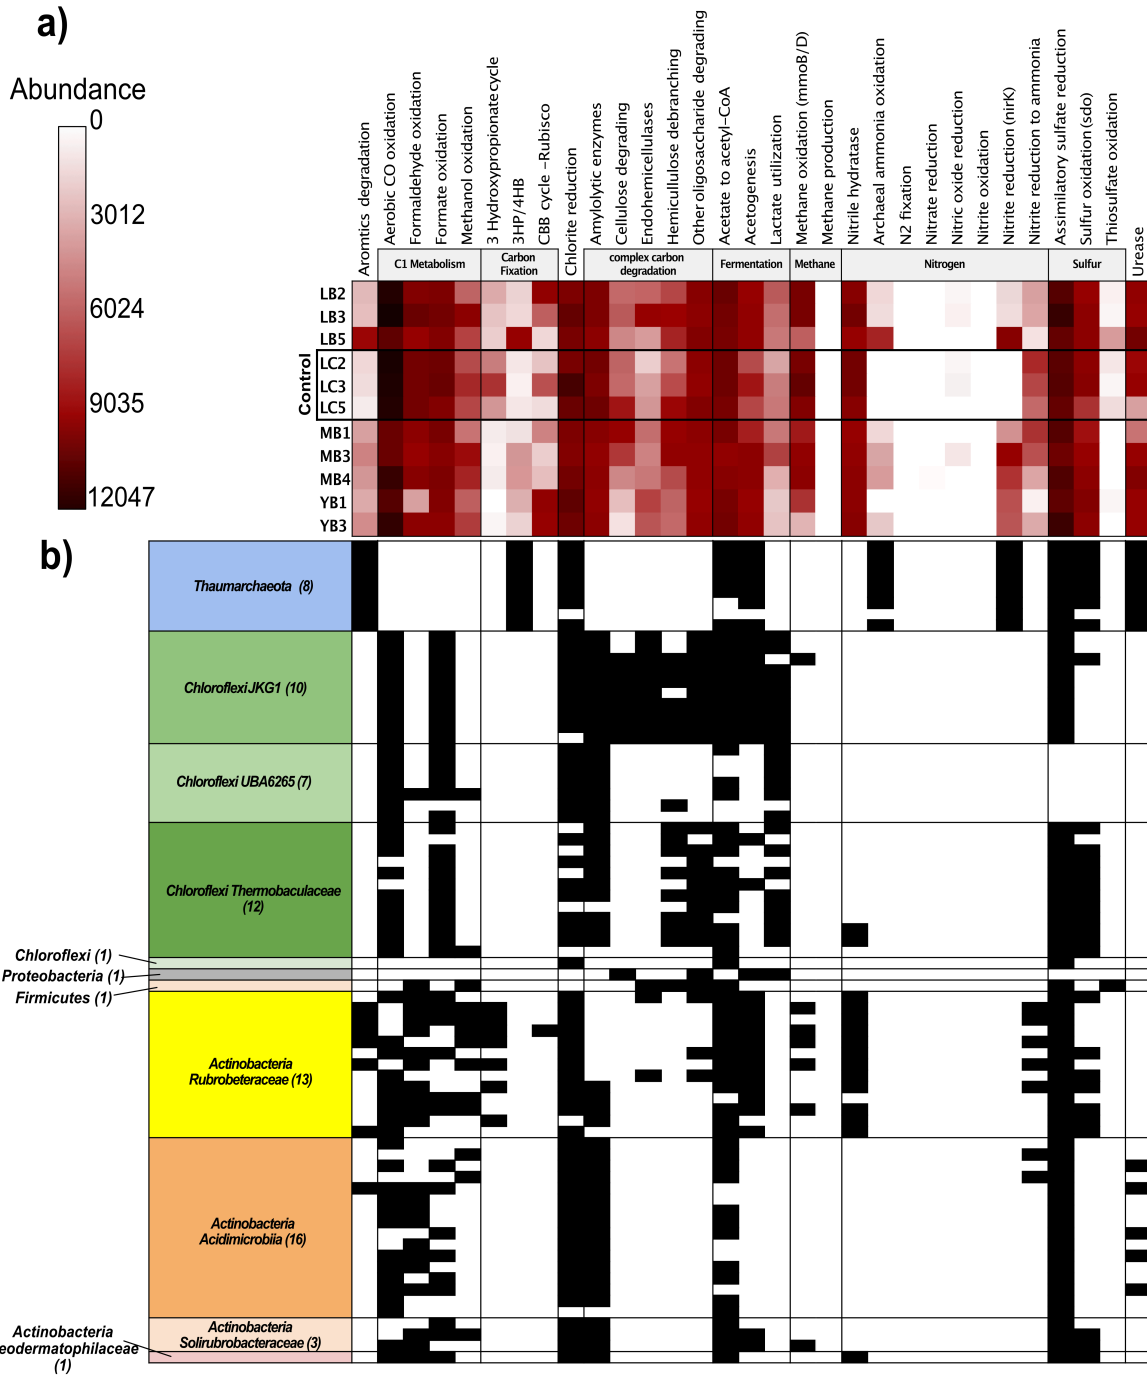

312

313 **Figure 3. Metabolic potential prediction across samples and high quality genomes. a)**

314 Normalized abundances of chemoautolithotrophic marker genes predicted using METABOLIC

315 for each sample. b) Presence (black) and absence (white) of chemoautolithotrophic marker genes in

316 high quality genomes. Genomes are clustered based on taxa and the number of genomes in each  
317 cluster is shown in parentheses in the row names.

318

319 ***A novel genus of Thaumarchaeota with highly conserved core genome and diverse auxiliary***

320 ***genes.*** Eight high quality Atacama Boulder Thaumarchaeal genomes (ABT) were assembled with

321 an average GC content of 34.6% ( $\pm$  0.1%) and average size of 2.5 Mbps ( $\pm$  0.4 Mbps). Each

322 genome contained on average 3,123 ( $\pm$  579.7) predicted genes with a mean coding density of

323 71.8% ( $\pm$  1.7%). The genomes were phylogenetically placed using 37 single-copy house-keeping

324 genes, forming a monophyletic sister cluster to the recently characterized *Ca. Nitrosocosmicus*

325 (**Figure 4a**). The ABT clade and *Ca. Nitrosocosmici* form a sister group to *Ca. Nitrososphaera*, a

326 mesophilic terrestrial clade. Genomes from the same sites were more related to each other, with

327 ABT-MB and ABT-YB genomes forming a separate branch from the ABT-LB genomes (**Figure**

328 **4b**). One copy of the ammonia monooxygenase A (*amoA*) gene was found in five ABT genomes

329 (**Table S10**). Upon closer look, two other genomes (ABT-MB3, ABT-MB4) contained conserved

330 *amoA* regions with unresolved assembly errors and therefore failed in protein prediction. No *amoA*

331 sequences were found in ABT-YB1. 3 additional unbinned *amoA* genes were detected across the

332 metagenomes (MB3, MB4, YB3). Altogether, the eight *amoA* nucleotide sequences were 100%

333 identical in their amino acid sequences to each other and to previously published *amoA* sequences

334 from *Ca. Nitrosocosmicus oleophilus* and *Ca. Nitrosocosmicus exaquare*, which had been

335 phylogenetically identified to be one of the basal clades of archaeal *amoA* after *Ca. Nitrosocaldus*

336 (55). **Figure S11** resolves the nucleotide level phylogenetic placement of binned *amoA* sequences

337 as well as unbinned *amoA* sequences recovered from the sample metagenomes. Interestingly, one

338 *amoA* recovered from a low quality bin (68% completeness; 5.8% contamination) in the YB3

339 metagenome (node “ABT-YB3 (low quality bin)” in **fig. S11**) was divergent (~80% ID) from the

340 rest at the nucleotide level, while 95.8% identical to other ABT and *Ca. Nitrosocosmicus amoA*  
341 genes at the amino acid level. The rpS3 gene recovered from this bin was classified as  
342 Thaumarchaeal, with 75% identity to other binned rpS3 in ABT, and its closest NCBI reference  
343 sequence being *Ca. Nitrosocosmicus* sequences at 65% identity. This divergent Thaumarchaeal  
344 bin was approximately three-fold less abundant than another Thaumarchaeal bin (ABT-YB3)  
345 recovered at a higher quality from the same metagenome (YB3). Due to low quality and lower  
346 abundance of this divergent bin, our study focuses on other eight high quality genomes that are  
347 much more closely related and found across all metagenomes under the boulder including YB3.

348 In order to taxonomically resolve the eight recovered *Thaumarchaeota* genomes, we  
349 compared them to *Ca. Nitrosocosmicus* genomes that had been isolated or metagenomically  
350 assembled from around the world (**Table S4**) in diverse environments ranging from the arctic soil  
351 (56), tar-contaminated soil (57), vegetable field (58), dinosaur fossil (59) to wastewater filters (60).  
352 High ANI (93.0 - 99.8%) (**Figure 4c**) between ABT genomes indicated that all ABT genomes  
353 belong to one genus. Using the ANI threshold of 95% (61,62) for species delineation, we identified  
354 two species within the ABT clade, with genomes recovered from LB site belonging to one species  
355 and the rest to another. The mean Amino Acid Identity (AAI) of 53.9% between pairs of *Ca.*  
356 *Nitrosocosmicus* and ABT genomes (**Figure 4d**) fall below the genus delineation threshold of 65%  
357 (63) indicating that the two clades form separate genera. Based on these findings, we propose two  
358 new species names that belong to a new genus: *Ca. Nitrosodesertus atacamaensis* (ABT-LB2,  
359 ABT-LB3, ABT-LB) and *Ca. Nitrosodesertus subpetramus* (ABT-MB1, ABT-MB3, ABT-MB4,  
360 ABT-YB1, ABT-YB3).

361 While the eight ABT genomes share a highly conserved core genome (mean AAI =  
362 96.5 %), between 11% and 49% (mean = 37.7%) of the genes had no other orthologs in the

363 recovered genomes despite the relatively similar and static environmental conditions that they  
364 were found in. High AAI in the orthologous fraction of the eight ABT genomes and conserved  
365 *amoAs* recovered in sites more than 200 km apart from each other suggest that ABTs originated  
366 from the same strain of *Thaumarchaeota*. However, large fractions of sample-specific auxiliary  
367 and divergent genes suggest site-specific adaptations to their respective isolated habitats.

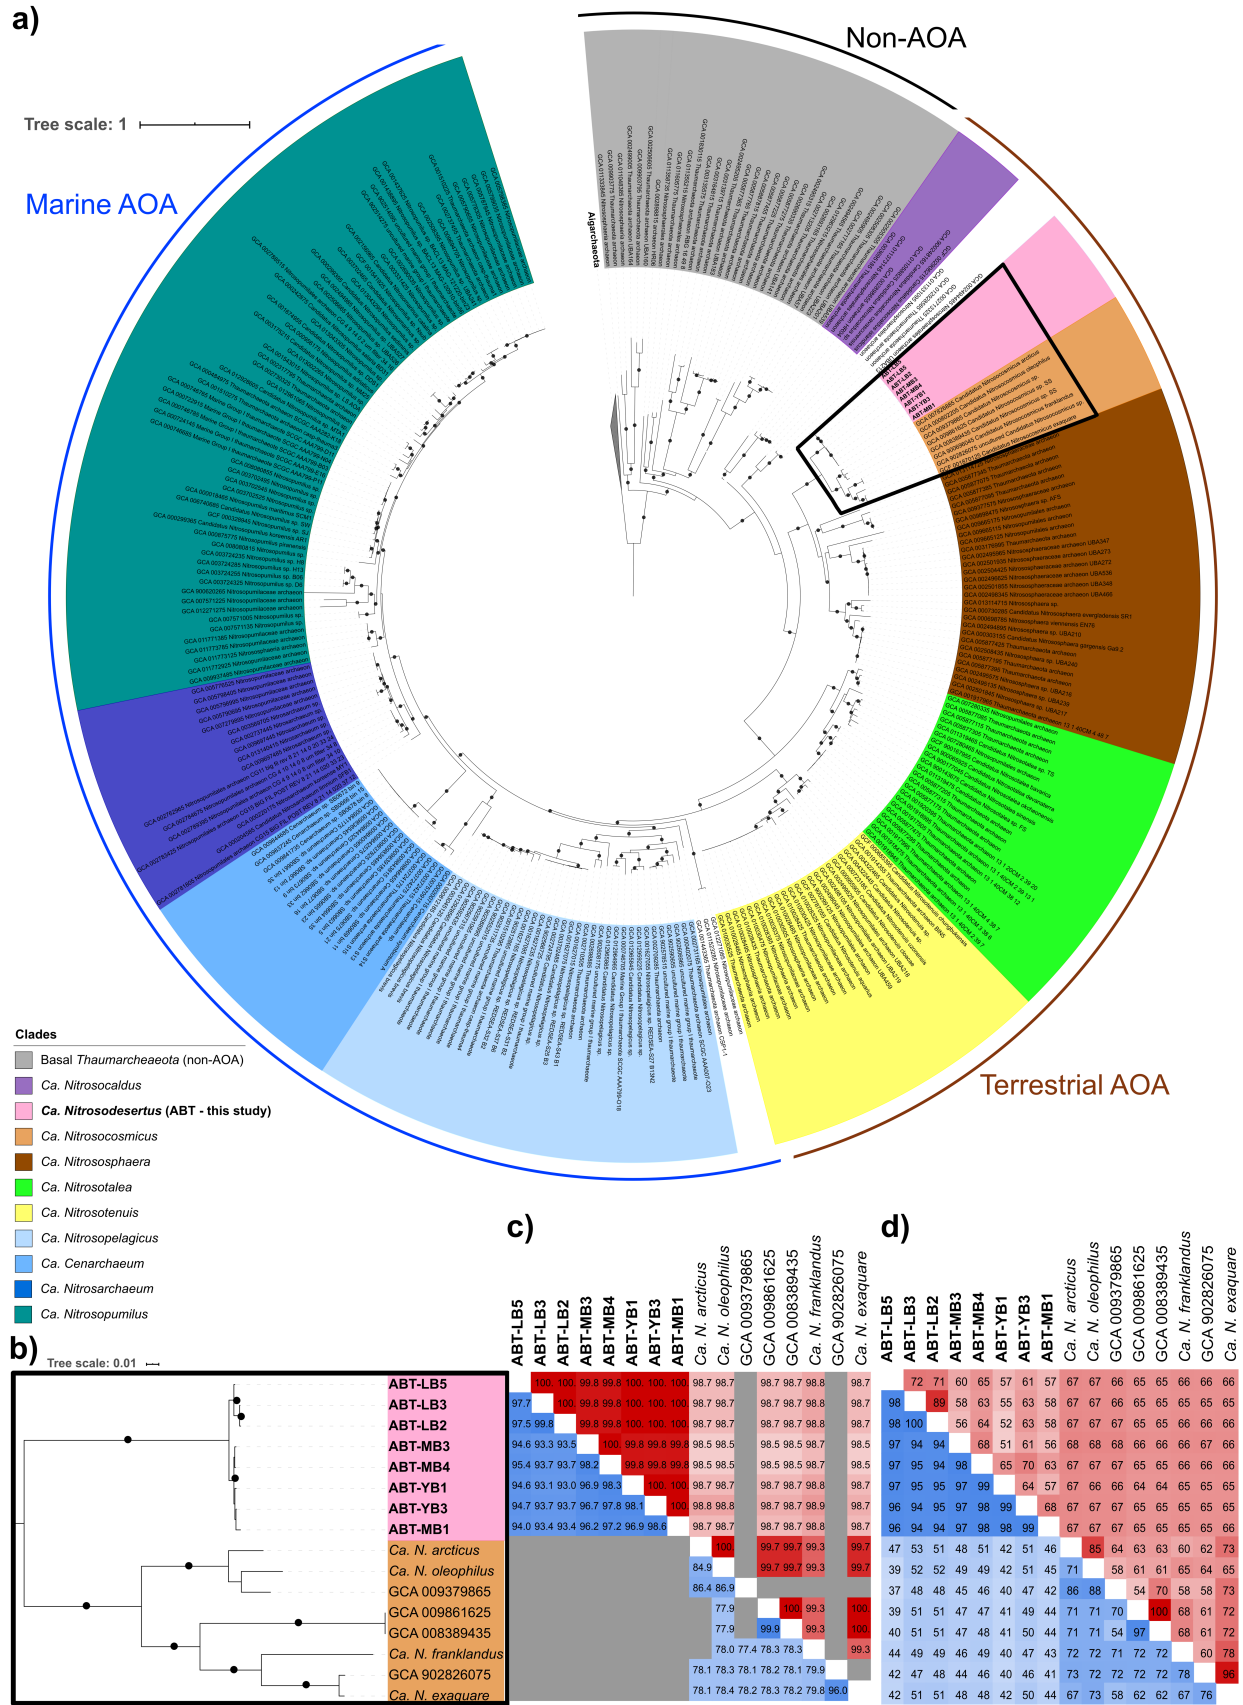

369 **Figure 4. Phylogenomic placement of ABT genomes using 37 housekeeping single-copy**  
370 **genes.** a) Phylogenetic tree of 298 NCBI genomes annotated as *Thaumarchaeota* and 8 ABT  
371 genomes. *Aigarchaeota* were identified and used as the outgroup. Black, brown and blue ranges  
372 distinguish whether organisms are Ammonia Oxidizing Archaea (AOA) and their typical habitats  
373 (terrestrial vs marine). Strongly supported branches as described in the M&M section are indicated  
374 with black dots. b) Zoomed view of the branches placing the ABT genomes and its sister group  
375 *Ca. Nitrosocosmicus*. Strongly supported branches as described in the M&M section are indicated  
376 with black dots. c) Lower-right (blue) triangle of the matrix corresponds to FastANI between  
377 genomes, where gray values indicate below calculation threshold (80% identity). Upper right (red)  
378 triangle of the matrix corresponds to 16S rRNA identity values, where gray values are used for  
379 genomic bins without a 16S rRNA. d) Lower right (blue) triangle corresponds to the Amino Acid  
380 Identity (AAI) and upper right (red) triangle corresponds to the Orthologous fraction (OF) between  
381 a pair of compared genomes.

382  
383

384 ***Pangenomic comparison of ABT genomes and their sister clade reveal unique adaptations***  
385 ***including heavy metal resistance, biofilm formation, water transport and sodium bioenergetics.***

386 In order to understand the conserved metabolic potentials between ABT and *Ca. Nitrosocosmicus*,  
387 unique adaptations of the ABT in the Atacama Desert, and niche differentiations between sites, we  
388 analyzed the highest quality (> 95% completeness, <5% contamination) genomes (ABT-LB3,  
389 ABT-MB4, ABT-YB3) from each of the three sites along with three (near)-complete *Ca.*  
390 *Nitrosocosmicus* reference genomes (*Ca. N. franklandus*, *Ca. N. oleophilus*, *Ca. N. exaquare*).  
391 1287 homolog clusters are shared across all six genomes (**Figure 5, Table S10**). For example, all  
392 genomes contained a highly conserved AmoABX operon, although only two out of eight ABT  
393 bins contained 1-2 *amoC* copies. All genomes revealed the metabolic potential for mixotrophy  
394 along with important genes for nitrogen cycling, including genes for copper-dependent nitrite  
395 reductase (*nirK*), urease (*Ure*), urea transporter, ammonium transporter, deaminases, lyases, and  
396 carbonic anhydrase (**Table S11**). Additionally, amongst the shared genes we found key stress  
397 response genes that could provide resilience against highly oxidizing environments (**Table S10**).

398 296 protein clusters were shared between ABT genomes but were not present in *Ca.*  
399 *Nitrosocosmicus* genomes (**Figure 5**). Notable genes identified in these clusters include those  
400 involved in biofilm production and cell adhesion capacity (**Table S10**). The ability of *Ca.*  
401 *Nitrosocosmicus oleophilus* to form biofilms and produce exopolysaccharide (EPS) has previously  
402 been demonstrated by Jung *et al.* (57). EPS production and biofilm formation in general are  
403 considered major adaptation mechanisms for xerotolerant bacteria (64) and ABT genomes may  
404 also employ this mechanism to protect against desiccation.

405 12.8% to 16.5% of the protein coding genes in each ABT genome belonged to unique  
406 protein clusters or were singletons (**Figure 5, Table S12**) that did not share any similarity to other

407 genes in the ABT genomes. Amongst singletons of the genome ABT-LB3, many were involved in  
408 membrane transport of metals, such as magnesium, copper and cobalt transporters as well as lead,  
409 cadmium, zinc and mercury transporting ATPases, potassium uptake proteins and bacterioferritin.  
410 The presence of these genes may be an adaptation to heavy metals known to accumulate in the  
411 Atacama Desert soils (65). Similarly, notable singletons found in genomes ABT-MB4 and ABT-  
412 YB3 included putative cobalt transporter, fluoride transporters, zinc uptake system, mercuric  
413 reductase, ferrous iron permease, and phosphite transport system. See supplementary results for  
414 further findings from the pangenome analysis.

415 Further genome comparisons across all eight ABT genomes revealed additional key  
416 adaptations to desiccation and osmotic stress. We identified up to seven different copies of water  
417 channel membrane proteins (aquaporin Z2) (66) per genome. Interestingly, some of these proteins  
418 were highly divergent from each other at the AA sequence level, while others were truncated  
419 (**Figure S12**) despite being found mid-contig with relatively conserved surrounding genes.  
420 Multiple copies of aquaporin genes per genome as well as the divergent and truncated subset  
421 indicate possible genome specific adaptations to desiccation and osmotic stress. We also recovered  
422 two distinct types of ATP synthases (namely A-type and V-type (67,68)) from the eight ABT  
423 genomes. Three ABT genomes (ABT-LB2, ABT-LB3, ABT-YB1) contained only A-type ATP  
424 synthase, while the rest contained both the A-type and the V-type ATP synthases often in multiple  
425 copies. Wang *et al.* (67) concluded that the V-type ATP synthases are horizontally transferred from  
426 *Euryarchaeota* and conserved among the acidophilic and hadopelagic *Thaumarchaeota*,  
427 potentially playing a key role in adaptations to acidic environments and elevated pressure through  
428 proton extrusion. Considering that Atacama Desert soils are slightly alkaline (average pH = 7.7  
429 **Figure S13**), it is surprising that the V-type ATP synthase is found and conserved across five ABT



430 genomes. Zhong *et al.* (68) hypothesized that these V-type ATP synthases may be coupled with  
431  $\text{Na}^+$  motive force instead of proton pumping. Atacama Desert soils present high salt stress, and  
432 therefore the V-type ATP synthase could perform  $\text{Na}^+$  pumping and provide protection against  
433 high sodium stress (**Table S14**). Notably, all genomes featured high-affinity  $\text{Na}^+/\text{H}^+$  antiporter  
434 NhaS, with ABT-LB2 and ABT-LB3 genomes featuring five copies, while the others featured a  
435 single copy. This may be correlated to the lack of  $\text{Na}^+$  binding V-type ATP synthase in ABT-LB2  
436 and ABT-LB3 genomes. Additional genes associated with  $\text{Na}^+$  bioenergetics were identified,  
437 including sodium/glucose transporter, putative calcium/sodium:proton antiporter, sodium bile  
438 acid symporter family protein, sodium/hydrogen exchanger and sodium-dependent dicarboxylate  
439 transporters. This suggests that ABT genomes are not only highly adapted to high salt  
440 concentrations but also are potentially capable of utilizing the sodium gradient to scavenge useful  
441 biomolecules for mixotrophic growth as well as generate ATP in the hyperarid core of the Atacama  
442 Desert.

443

444

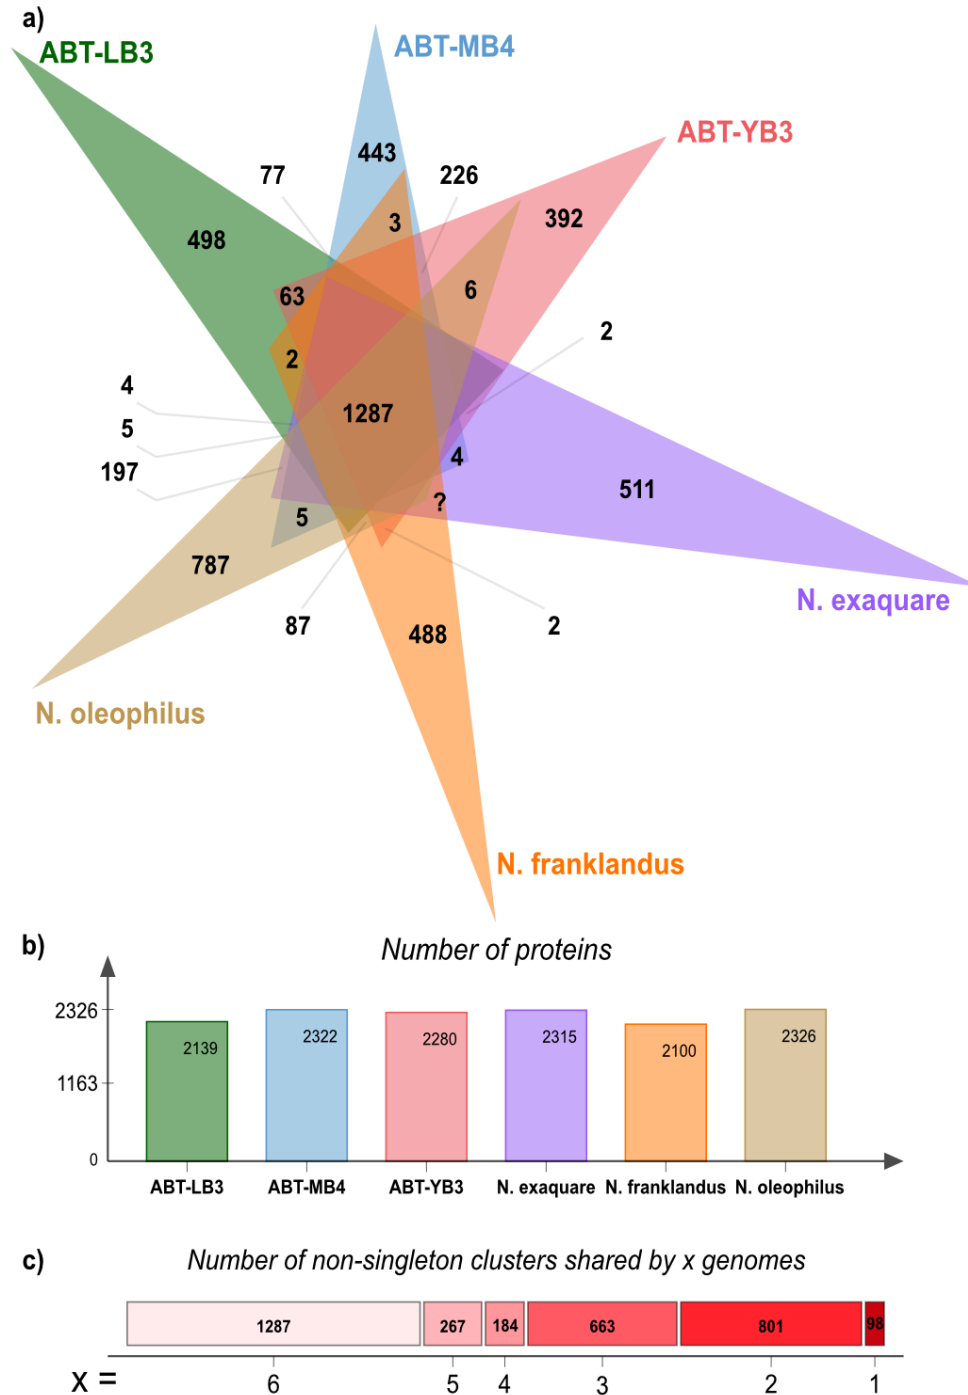

445  
 446 **Figure 5. Shared and auxiliary protein clusters of ABT and its sister genus.** a) Shared  
 447 orthologous protein clusters (including singletons) across six genomes (three *Ca. Nitrosocosmicus*,  
 448 three *Ca. Nitrosodesertus* [ABT]). b) Number of proteins in each genome. c) Number of  
 449 orthologous protein clusters (excluding singletons) shared across x number of genomes.

450

451

## Conclusions

452 We report here the first evidence of highly adapted ammonia-oxidizing *Thaumarchaeota*  
453 inhabiting the hyperarid Atacama Desert in high relative abundance, including the first systematic  
454 comparison of microbial communities found below boulders of the Atacama Desert hyperarid core  
455 with the microbial communities present in the open, unprotected desert soil. This study expands  
456 the realm of Thaumarchaeal presence revealing high adaptability and resilience to hyperarid, high  
457 salt and low-nutrient environments. In-depth genomic characterization of these ABT genomes  
458 elucidated their niche potential roles in N and C cycling in highly nutrient deficient Atacama  
459 Desert soils, as well as key adaptations against oxidative stress, salt stress and hyperaridity. By  
460 comparing the eight closely related ABT genomes retrieved from these isolated and disconnected  
461 habitats, we hypothesize *Ca. Nitrosodesertus* to be a potentially endemic *Thaumarchaeota* genus  
462 in the Atacama Desert, with organisms in this genus harboring highly conserved shared genes and  
463 large numbers of site-specific auxiliary genes. Beyond the Atacama Desert, this study provides a  
464 blueprint for future studies of extreme terrestrial environments (i.e. Antarctic and extraterrestrial)  
465 where finding pockets of pristine, sheltered and contained environments, as simple as below  
466 boulders, could lead to a discovery of uniquely conserved communities and help delineate the  
467 indigenous microbial community members adapted to extreme conditions.

468

### **Acknowledgements**

469 This work was funded by ERC Advanced Grant HOME (# 339231) to DSM. AJP and TVLB were  
470 supported by the Ministerium für Kultur und Wissenschaft des Landes Nordrhein-Westfalen  
471 (“Nachwuchsgruppe Dr. Alexander Probst”). We thank Bärbel Försel for insightful discussions,  
472 Manuela Alt and Kirstin Weiß for TOC measurements, Thomas Neumann for providing access to  
473 the XRD laboratory, and Iris Pieper and Claudia Kuntz for technical assistance and measurement  
474 of water-soluble ion species.

475

476

### **Competing Interests**

477 All authors declare that they have no competing interests.

478

479

### **Author contributions**

480 DSM and YH conceived the project; YH, FLA, and AA planned and conducted sampling; JSS and  
481 MS prepared metagenomic libraries and performed sequencing as well as initial quality filtering  
482 of reads; YH assembled, curated and analyzed sequence data with contribution from TLVB and  
483 AJP; AJP provided computational resources; FLA performed geochemical analyses and AA  
484 provided input in data interpretation; PSA performed phylogenetic analysis; YH wrote the  
485 manuscript with contribution from AJP; all authors discussed and revised the manuscript.

486

## References

- 487 1. Houston J, Hartley AJ. The central Andean west-slope rainshadow and its potential  
488 contribution to the origin of hyper-aridity in the Atacama Desert [Internet]. Vol. 23,  
489 International Journal of Climatology. 2003. p. 1453–64. Available from:  
490 <http://dx.doi.org/10.1002/joc.938>
- 491 2. Schulze-Makuch D, Wagner D, Kounaves SP, Mangelsdorf K, Devine KG, de Vera J-P, et  
492 al. Transitory microbial habitat in the hyperarid Atacama Desert. Proc Natl Acad Sci U S A.  
493 2018 Mar 13;115(11):2670–5.
- 494 3. Azua-Bustos A, Caro-Lara L, Vicuña R. Discovery and microbial content of the driest site  
495 of the hyperarid Atacama Desert, Chile [Internet]. Vol. 7, Environmental Microbiology  
496 Reports. 2015. p. 388–94. Available from: <http://dx.doi.org/10.1111/1758-2229.12261>
- 497 4. Navarro-González R, Rainey FA, Molina P, Bagaley DR, Hollen BJ, de la Rosa J, et al.  
498 Mars-like soils in the Atacama Desert, Chile, and the dry limit of microbial life. Science.  
499 2003 Nov 7;302(5647):1018–21.
- 500 5. Brown CT, Olm MR, Thomas BC, Banfield JF. Measurement of bacterial replication rates  
501 in microbial communities [Internet]. Vol. 34, Nature Biotechnology. 2016. p. 1256–63.  
502 Available from: <http://dx.doi.org/10.1038/nbt.3704>
- 503 6. Azúa-Bustos A, González-Silva C, Mancilla RA, Salas L, Gómez-Silva B, McKay CP, et al.  
504 Hypolithic Cyanobacteria Supported Mainly by Fog in the Coastal Range of the Atacama  
505 Desert [Internet]. Vol. 61, Microbial Ecology. 2011. p. 568–81. Available from:  
506 <http://dx.doi.org/10.1007/s00248-010-9784-5>
- 507 7. Moreno ML, Piubeli F, Bonfa MRL, García MT, Durrant LR, Mellado E. Analysis and  
508 characterization of cultivable extremophilic hydrolytic bacterial community in heavy-metal-  
509 contaminated soils from the Atacama Desert and their biotechnological potentials. J Appl  
510 Microbiol. 2012;113(3):550–9.
- 511 8. Fernández-Martínez MÁ, Dos Santos Severino R, Moreno-Paz M, Gallardo-Carreño I,  
512 Blanco Y, Warren-Rhodes K, et al. Prokaryotic Community Structure and Metabolisms in  
513 Shallow Subsurface of Atacama Desert Playas and Alluvial Fans After Heavy Rains:  
514 Repairing and Preparing for Next Dry Period. Front Microbiol. 2019 Jul 24;10:1641.
- 515 9. Könneke M, Schubert DM, Brown PC, Hügler M, Standfest S, Schwander T, et al.  
516 Ammonia-oxidizing archaea use the most energy-efficient aerobic pathway for CO<sub>2</sub>  
517 fixation. Proc Natl Acad Sci U S A. 2014 Jun 3;111(22):8239–44.
- 518 10. Karner MB, DeLong EF, Karl DM. Archaeal dominance in the mesopelagic zone of the  
519 Pacific Ocean. Nature. 2001 Jan 25;409(6819):507–10.
- 520 11. Fierer N, Leff JW, Adams BJ, Nielsen UN, Bates ST, Lauber CL, et al. Cross-biome  
521 metagenomic analyses of soil microbial communities and their functional attributes. Proc  
522 Natl Acad Sci U S A. 2012 Dec 26;109(52):21390–5.

- 523 12. Pointing SB, Chan Y, Lacap DC, Lau MCY, Jurgens JA, Farrell RL. Highly specialized  
524 microbial diversity in hyper-arid polar desert. *Proc Natl Acad Sci U S A*. 2009 Nov  
525 24;106(47):19964–9.
- 526 13. Maza F, Maldonado J, Vásquez-Dean J, Mandakovic D, Gaete A, Cambiazo V, et al. Soil  
527 Bacterial Communities From the Chilean Andean Highlands: Taxonomic Composition and  
528 Culturability. *Front Bioeng Biotechnol*. 2019 Feb 5;7:10.
- 529 14. Neilson JW, Califf K, Cardona C, Copeland A, van Treuren W, Josephson KL, et al.  
530 Significant Impacts of Increasing Aridity on the Arid Soil Microbiome. *mSystems*  
531 [Internet]. 2017 May;2(3). Available from: <http://dx.doi.org/10.1128/mSystems.00195-16>
- 532 15. Huang M, Chai L, Jiang D, Zhang M, Zhao Y, Huang Y. Increasing aridity affects soil  
533 archaeal communities by mediating soil niches in semi-arid regions. *Sci Total Environ*. 2019  
534 Jan 10;647:699–707.
- 535 16. Singh BK. Archaea in a hyper-arid polar desert [Internet]. Vol. 107, Proceedings of the  
536 National Academy of Sciences. 2010. p. E1–E1. Available from:  
537 <http://dx.doi.org/10.1073/pnas.0912316107>
- 538 17. Finstad KM, Probst AJ, Thomas BC, Andersen GL, Demergasso C, Echeverría A, et al.  
539 Microbial Community Structure and the Persistence of Cyanobacterial Populations in Salt  
540 Crusts of the Hyperarid Atacama Desert from Genome-Resolved Metagenomics. *Front*  
541 *Microbiol*. 2017;8:1435.
- 542 18. Matmon A, Quade J, Placzek C, Fink D, Copeland A, Neilson JW, et al. Seismic origin of  
543 the Atacama Desert boulder fields [Internet]. Vol. 231, *Geomorphology*. 2015. p. 28–39.  
544 Available from: <http://dx.doi.org/10.1016/j.geomorph.2014.11.008>
- 545 19. Quade J, Reiners P, Placzek C, Matmon A, Pepper M, Ojha L, et al. Seismicity and the  
546 strange rubbing boulders of the Atacama desert, Northern Chile. *Geology*. 2012 Sep  
547 1;40(9):851–4.
- 548 20. Sager C, Airo A, Arens FL, Rabethge C, Schulze-Makuch D. New types of boulder  
549 accumulations in the hyper-arid Atacama Desert [Internet]. Vol. 350, *Geomorphology*.  
550 2020. p. 106897. Available from: <http://dx.doi.org/10.1016/j.geomorph.2019.106897>
- 551 21. Placzek CJ, Matmon A, Granger DE, Quade J, Niedermann S. Evidence for active landscape  
552 evolution in the hyperarid Atacama from multiple terrestrial cosmogenic nuclides. *Earth*  
553 *Planet Sci Lett*. 2010 Jun 15;295(1):12–20.
- 554 22. Dunai TJ, González López GA, Juez-Larré J. Oligocene–Miocene age of aridity in the  
555 Atacama Desert revealed by exposure dating of erosion-sensitive landforms [Internet]. Vol.  
556 33, *Geology*. 2005. p. 321. Available from: <http://dx.doi.org/10.1130/g21184.1>
- 557 23. Edgar RC. Search and clustering orders of magnitude faster than BLAST. *Bioinformatics*.  
558 2010 Oct 1;26(19):2460–1.
- 559 24. Sharon I, Morowitz MJ, Thomas BC, Costello EK, Relman DA, Banfield JF. Time series

- 560 community genomics analysis reveals rapid shifts in bacterial species, strains, and phage  
561 during infant gut colonization. *Genome Res.* 2013 Jan;23(1):111–20.
- 562 25. Langdon WB. Performance of genetic programming optimised Bowtie2 on genome  
563 comparison and analytic testing (GCAT) benchmarks. *BioData Min.* 2015 Jan 8;8(1):1.
- 564 26. Edgar RC. MUSCLE: a multiple sequence alignment method with reduced time and space  
565 complexity. *BMC Bioinformatics.* 2004 Aug 19;5:113.
- 566 27. Criscuolo A, Gribaldo S. BMGE (Block Mapping and Gathering with Entropy): a new  
567 software for selection of phylogenetic informative regions from multiple sequence  
568 alignments [Internet]. Vol. 10, *BMC Evolutionary Biology*. 2010. p. 210. Available from:  
569 <http://dx.doi.org/10.1186/1471-2148-10-210>
- 570 28. Nguyen L-T, Schmidt HA, von Haeseler A, Minh BQ. IQ-TREE: a fast and effective  
571 stochastic algorithm for estimating maximum-likelihood phylogenies. *Mol Biol Evol.* 2015  
572 Jan;32(1):268–74.
- 573 29. Letunic I, Bork P. Interactive Tree Of Life (iTOL) v4: recent updates and new  
574 developments. *Nucleic Acids Res.* 2019 Jul 2;47(W1):W256–9.
- 575 30. Oksanen J, Blanchet FG, Kindt R, Legendre P, Minchin P. The vegan package: Community  
576 Ecology Package. R package version 2.0--2. 2011 Jan 1;
- 577 31. Core Team R, Others. R: A language and environment for statistical computing. Vienna,  
578 Austria: R Foundation for Statistical Computing. Available. 2013;
- 579 32. Bray JR, Curtis JT. An ordination of upland forest communities of southern Wisconsin.  
580 *Ecological Monographs* (27). *Change in Marine Communities: An Approach to Statistical*  
581 *Analysis and Interpretation*. PRIMER-E Plymouth; 1957. p. 325–49.
- 582 33. Clarke KR, Ainsworth M. A method of linking multivariate community structure to  
583 environmental variables. *Marine Ecology-Progress Series.* 1993;92:205–205.
- 584 34. Fisher RA. XV.—The Correlation between Relatives on the Supposition of Mendelian  
585 Inheritance. *Earth Environ Sci Trans R Soc Edinb.* 1919;52(2):399–433.
- 586 35. Mielke PW, Berry KJ, Johnson ES. Multi-response permutation procedures for a priori  
587 classifications [Internet]. Vol. 5, *Communications in Statistics - Theory and Methods*. 1976.  
588 p. 1409–24. Available from: <http://dx.doi.org/10.1080/03610927608827451>
- 589 36. Darling AE, Jospin G, Lowe E, Matsen FA 4th, Bik HM, Eisen JA. PhyloSift: phylogenetic  
590 analysis of genomes and metagenomes. *PeerJ.* 2014 Jan 9;2:e243.
- 591 37. Parks DH, Imelfort M, Skennerton CT, Hugenholtz P, Tyson GW. CheckM: assessing the  
592 quality of microbial genomes recovered from isolates, single cells, and metagenomes.  
593 *Genome Res.* 2015 Jul;25(7):1043–55.
- 594 38. Kalyaanamoorthy S, Minh BQ, Wong TKF, von Haeseler A, Jermini LS. ModelFinder: fast

- 595 model selection for accurate phylogenetic estimates. *Nat Methods*. 2017 Jun;14(6):587–9.
- 596 39. Wang H-C, Minh BQ, Susko E, Roger AJ. Modeling Site Heterogeneity with Posterior  
597 Mean Site Frequency Profiles Accelerates Accurate Phylogenomic Estimation. *Syst Biol*.  
598 2018 Mar 1;67(2):216–35.
- 599 40. Hoang DT, Chernomor O, von Haeseler A, Minh BQ, Vinh LS. UFBoot2: Improving the  
600 Ultrafast Bootstrap Approximation. *Mol Biol Evol*. 2018 Feb 1;35(2):518–22.
- 601 41. Guindon S, Dufayard J-F, Lefort V, Anisimova M, Hordijk W, Gascuel O. New algorithms  
602 and methods to estimate maximum-likelihood phylogenies: assessing the performance of  
603 PhyML 3.0. *Syst Biol*. 2010 May;59(3):307–21.
- 604 42. Jain C, Rodriguez-R LM, Phillippy AM, Konstantinidis KT, Aluru S. High throughput ANI  
605 analysis of 90K prokaryotic genomes reveals clear species boundaries. *Nat Commun*. 2018  
606 Nov 30;9(1):5114.
- 607 43. Xu L, Dong Z, Fang L, Luo Y, Wei Z, Guo H, et al. OrthoVenn2: a web server for whole-  
608 genome comparison and annotation of orthologous clusters across multiple species. *Nucleic  
609 Acids Res*. 2019 Jul 2;47(W1):W52–8.
- 610 44. Placzek C, Granger DE, Matmon A, Quade J, Ryb U. Geomorphic process rates in the  
611 central Atacama Desert, Chile: Insights from cosmogenic nuclides and implications for the  
612 onset of hyperaridity [Internet]. Vol. 314, *American Journal of Science*. 2014. p. 1462–512.  
613 Available from: <http://dx.doi.org/10.2475/10.2014.03>
- 614 45. Azua-Bustos A, González-Silva C, Fernández-Martínez MÁ, Arenas-Fajardo C, Fonseca R,  
615 Martín-Torres FJ, et al. Aeolian transport of viable microbial life across the Atacama Desert,  
616 Chile: Implications for Mars. *Sci Rep*. 2019 Aug 22;9(1):11024.
- 617 46. Mincer TJ, Church MJ, Taylor LT, Preston C, Karl DM, DeLong EF. Quantitative  
618 distribution of presumptive archaeal and bacterial nitrifiers in Monterey Bay and the North  
619 Pacific Subtropical Gyre. *Environ Microbiol*. 2007 May;9(5):1162–75.
- 620 47. Merbt SN, Stahl DA, Casamayor EO, Martí E, Nicol GW, Prosser JI. Differential  
621 photoinhibition of bacterial and archaeal ammonia oxidation. *FEMS Microbiol Lett*. 2012  
622 Feb;327(1):41–6.
- 623 48. Church MJ, DeLong EF, Ducklow HW, Karner MB, Preston CM, Karl DM. Abundance and  
624 distribution of planktonic Archaea and Bacteria in the waters west of the Antarctic Peninsula  
625 [Internet]. Vol. 48, *Limnology and Oceanography*. 2003. p. 1893–902. Available from:  
626 <http://dx.doi.org/10.4319/lo.2003.48.5.1893>
- 627 49. Smith JM, Chavez FP, Francis CA. Ammonium Uptake by Phytoplankton Regulates  
628 Nitrification in the Sunlit Ocean [Internet]. Vol. 9, *PLoS ONE*. 2014. p. e108173. Available  
629 from: <http://dx.doi.org/10.1371/journal.pone.0108173>
- 630 50. Tolar BB, Powers LC, Miller WL, Wallsgrove NJ, Popp BN, Hollibaugh JT. Ammonia  
631 Oxidation in the Ocean Can Be Inhibited by Nanomolar Concentrations of Hydrogen



- 632 Peroxide [Internet]. Vol. 3, *Frontiers in Marine Science*. 2016. Available from:  
633 <http://dx.doi.org/10.3389/fmars.2016.00237>
- 634 51. Georgiou CD, Sun HJ, McKay CP, Grintzalis K, Papapostolou I, Zisimopoulos D, et al.  
635 Evidence for photochemical production of reactive oxygen species in desert soils. *Nat*  
636 *Commun*. 2015 May 11;6:7100.
- 637 52. Reich M, Bao H. Nitrate Deposits of the Atacama Desert: A Marker of Long-Term  
638 Hyperaridity [Internet]. Vol. 14, *Elements*. 2018. p. 251–6. Available from:  
639 <http://dx.doi.org/10.2138/gselements.14.4.251>
- 640 53. Stahl DA, de la Torre JR. Physiology and Diversity of Ammonia-Oxidizing Archaea  
641 [Internet]. Vol. 66, *Annual Review of Microbiology*. 2012. p. 83–101. Available from:  
642 <http://dx.doi.org/10.1146/annurev-micro-092611-150128>
- 643 54. Kobayashi S, Hira D, Yoshida K, Toyofuku M, Shida Y, Ogasawara W, et al. Nitric Oxide  
644 Production from Nitrite Reduction and Hydroxylamine Oxidation by Copper-containing  
645 Dissimilatory Nitrite Reductase (NirK) from the Aerobic Ammonia-oxidizing Archaeon,  
646 *Nitrososphaera viennensis*. *Microbes Environ*. 2018 Dec 28;33(4):428–34.
- 647 55. Alves RJE, Minh BQ, Urich T, von Haeseler A, Schleper C. Unifying the global phylogeny  
648 and environmental distribution of ammonia-oxidising archaea based on amoA genes. *Nat*  
649 *Commun*. 2018 Apr 17;9(1):1517.
- 650 56. Alves RJE, Kerou M, Zappe A, Bittner R, Abby SS, Schmidt HA, et al. Ammonia Oxidation  
651 by the Arctic Terrestrial Thaumarchaeote *Nitrosocosmicus arcticus* Is Stimulated by  
652 Increasing Temperatures. *Front Microbiol*. 2019 Jul 17;10:1571.
- 653 57. Jung M-Y, Kim J-G, Sinnighe Damsté JS, Rijpstra WIC, Madsen EL, Kim S-J, et al. A  
654 hydrophobic ammonia-oxidizing archaeon of the *Nitrosocosmicus* clade isolated from coal  
655 tar-contaminated sediment. *Environ Microbiol Rep*. 2016 Dec;8(6):983–92.
- 656 58. Liu L, Li S, Han J, Lin W, Luo J. A Two-Step Strategy for the Rapid Enrichment of  
657 *Nitrosocosmicus*-Like Ammonia-Oxidizing Thaumarchaea [Internet]. Vol. 10, *Frontiers in*  
658 *Microbiology*. 2019. Available from: <http://dx.doi.org/10.3389/fmicb.2019.00875>
- 659 59. Liang R, Lau MCY, Saitta ET, Garvin ZK, Onstott TC. Genome-centric resolution of novel  
660 microbial lineages in an excavated *Centrosaurus* dinosaur fossil bone from the Late  
661 Cretaceous of North America. *Environmental Microbiome*. 2020 Mar 19;15(1):8.
- 662 60. Sauder LA, Albertsen M, Engel K, Schwarz J, Nielsen PH, Wagner M, et al. Cultivation and  
663 characterization of *Candidatus Nitrosocosmicus exaquare*, an ammonia-oxidizing archaeon  
664 from a municipal wastewater treatment system. *ISME J*. 2017 May;11(5):1142–57.
- 665 61. Meier-Kolthoff JP, Auch AF, Klenk H-P, Göker M. Genome sequence-based species  
666 delimitation with confidence intervals and improved distance functions. *BMC*  
667 *Bioinformatics*. 2013 Feb 21;14:60.
- 668 62. Goris J, Konstantinidis KT, Klappenbach JA, Coenye T, Vandamme P, Tiedje JM. DNA--

- 669 DNA hybridization values and their relationship to whole-genome sequence similarities. *Int*  
670 *J Syst Evol Microbiol.* 2007;57(1):81–91.
- 671 63. Konstantinidis KT, Rosselló-Móra R, Amann R. Uncultivated microbes in need of their own  
672 taxonomy. *ISME J.* 2017 Nov;11(11):2399–406.
- 673 64. Lebre PH, De Maayer P, Cowan DA. Xerotolerant bacteria: surviving through a dry spell.  
674 *Nat Rev Microbiol.* 2017 May;15(5):285–96.
- 675 65. Moreno ML, Piubeli F, Bonfá MRL, García MT, Durrant LR, Mellado E. Analysis and  
676 characterization of cultivable extremophilic hydrolytic bacterial community in heavy-metal-  
677 contaminated soils from the Atacama Desert and their biotechnological potentials. *J Appl*  
678 *Microbiol.* 2012 Sep;113(3):550–9.
- 679 66. Calamita G. The *Escherichia coli* aquaporin-Z water channel: MicroReview. *Mol Microbiol.*  
680 2000;37(2):254–62.
- 681 67. Wang B, Qin W, Ren Y, Zhou X, Jung M-Y, Han P, et al. Expansion of Thaumarchaeota  
682 habitat range is correlated with horizontal transfer of ATPase operons. *ISME J.* 2019  
683 Dec;13(12):3067–79.
- 684 68. Zhong H, Lehtovirta-Morley L, Liu J, Zheng Y, Lin H, Song D, et al. Novel insights into the  
685 Thaumarchaeota in the deepest oceans: their metabolism and potential adaptation  
686 mechanisms. *Microbiome.* 2020 Jun 1;8(1):78.
- 687

688 **Supplementary Information for:**

689

690 **Leave no stone unturned: The hidden potential of carbon and nitrogen cycling by novel, highly**  
691 **adapted *Thaumarchaeota* in the Atacama Desert hyperarid core**

692

693 Yunha Hwang<sup>1</sup>, Dirk Schulze-Makuch<sup>1\*</sup>, Felix L. Arens<sup>1</sup>, Johan S. Saenz<sup>3</sup>, Panagiotis S. Adam<sup>2</sup>,  
694 Till L.V. Bornemann<sup>2</sup>, Alessandro Airo<sup>1</sup>, Michael Schloter<sup>3</sup>, Alexander J. Probst<sup>2\*</sup>

695

696 \*corresponding authors

697 **Affiliations:**

698 <sup>1</sup> Center of Astronomy & Astrophysics, Technical University Berlin, 10623, Berlin, Germany

699 <sup>2</sup> Environmental Microbiology and Biotechnology, Department of Chemistry, University of

700 Duisburg-Essen, 45141, Essen, Germany

701 <sup>3</sup> Research Unit for Comparative Microbiome Analysis, Helmholtz Zentrum München, 85758,

702 Oberschleißheim, Germany

703

704 To whom the correspondence should be addressed:

705 [alexander.probst@uni-due.de](mailto:alexander.probst@uni-due.de)

706 [schulze-makuch@tu-berlin.de](mailto:schulze-makuch@tu-berlin.de)

707

708

709 **List of Content:**

710 - Supplementary Materials and Methods (M1-M7)

711 - Supplementary Results and Discussion

712 - Figures S1-S12 and Tables S1 and S2

713 - Legends for Supplementary Tables S3-14

714 - Descriptions for additional Supplementary File

715

## 716 **Supplementary Materials and Methods**

717

### 718 **M1. Field measurements**

719 The HOBO U23 pro Temperature/Relative Humidity data logger (Onset, Cat# U23-001, MA,  
720 USA) was used to monitor the temperature and relative humidity of each site at the time of  
721 sampling. For each sampling site (Y, M, L), an extra boulder was chosen for conducting HOBO  
722 logger measurements. One logger was placed under a boulder similarly sized to those chosen for  
723 sampling, and another logger was placed ~20 cm away from the boulder on the open soil. For the  
724 Y site, a continuous measurement over 130 days (15 March - 25 July 2019) was conducted for  
725 characterizing diurnal fluctuations for both below boulder, beside boulder and 1 m above ground.  
726 Logged data was then used to calculate dew point temperatures as described in Lawrence *et al.*  
727 (1).

728

### 729 **M2. pH and electrical conductivity**

730 To evaluate the pH and the electric conductivity (EC) of the soil, samples were prepared in a ratio  
731 1:5 v/v (5 ml sample to 25 ml distilled water), shaken for one hour to prevent the particle from  
732 settling and sedimented for another hour, before measuring pH (691 pH Meter, Metrohm,  
733 Switzerland). The standard deviation was determined by repeated measurements of in-house  
734 standards, SD = 0.24 (n = 16). EC was measured with a handheld electric conductivity meter  
735 (GMH 3400, Greisinger, Germany). Reproducibility variation was 5% (n = 3). Both measurements  
736 were conducted at the Center of Astronomy and Astrophysics the Technische Universität Berlin.

737

### 738 **M3. Anion and cation analysis**

739 Samples and processing controls for water-soluble ion analysis were prepared based on the  
740 standard DIN EN 12457 - 4 (2003) protocol. Briefly, samples were sieved to obtain <2 mm  
741 particles which were used to prepare an eluate of a 1:10 w/w (4.5 g sample to 45 g distilled water).  
742 After 24 h of continuous shaking, the eluate was filtered through 0.2 µm mesh and stored at -20°C  
743 until measurement. Anionic species (Cl<sup>-</sup>, NO<sub>3</sub><sup>-</sup>, PO<sub>4</sub><sup>3-</sup>, SO<sub>4</sub><sup>2-</sup>) were measured by ion  
744 chromatography (DIONEX DX-120 Ion chromatograph, Thermo Fisher Scientific, USA, with a  
745 guard column AG 22, 4x50 mm and an analytical column AS 22, 4x250 mm). Reproducibility  
746 variation was <1% (n = 5). Cations (Ca<sup>2+</sup>, Fe<sup>2+</sup>, K<sup>+</sup>, Mg<sup>2+</sup>, Mn<sup>2+</sup>, Na<sup>+</sup>) were determined by  
747 inductively-coupled plasma optical emission spectrometry (iCAP 6000 ICP Spectrometer, Thermo  
748 Fisher Scientific, USA). Reproducibility variation was <5% (n = 5). Both analyses were conducted  
749 at the Department of Soil Science of the Technische Universität Berlin. Bray-Curtis distance  
750 (“vegan” package (2)) metric was used to calculate the distance matrix of samples based on the  
751 ion concentrations, which was then used for non-metric multidimensional scaling analysis in R  
752 (3).

753

### 754 **M4. Total organic carbon analysis**

755 The total organic carbon (TOC) was measured with an elemental analyzer (Vario Max C,  
756 Elementar, Germany) using catalytic tube combustion at the Department of Life Science of the  
757 Humboldt Universität Berlin. Samples were first ground to powder. Due to low TOC  
758 concentrations, 1 g was used for combustion. At 600°C the organic carbon was removed under the  
759 carrier gas nitrogen and oxidized by oxygen in the presence of copper oxide. Remaining elemental  
760 carbon was combusted with the addition of oxygen. The resulting CO<sub>2</sub> was then determined  
761 successively by infrared detection. The measurement was conducted in duplicates with a detection

762 limit of 0.0124 wt%.

### 763 **M5. Bulk mineralogy**

764 For the bulk mineralogy, soil samples were homogenized and ground to powder. X-ray powder  
765 diffraction (XRD) analysis of the soil salts was performed by using a powder diffractometer (D2  
766 Phaser, Bruker, USA) at the Department of Applied Geochemistry of the Technische Universität  
767 Berlin. The X-ray source was Cu K $\alpha$  radiation (K-alpha1 = 1.540598 Å, K-alpha2 = 1.54439 Å)  
768 with a performance of 30 kV and 10 mA. A step interval of 0.013° 2 $\Theta$  with a step-counting time  
769 of 0.5 s was used in a scanning range from 3° to 80° 2 $\Theta$ . Semi-quantitative mineral content was  
770 calculated based on relative intensity values using the software package DIFRAC.EVA V2  
771 (Bruker, USA). Absolute reproducibility variation was < 1% (n = 4).

### 772 **M6. DNA extraction, Illumina library preparation and sequencing**

773 Metagenomic DNA was extracted from 10 g of soil as described previously (4). Briefly, the soil  
774 was mixed for 30 minutes in 40 mL cell extraction buffer (1% PEG 8000 ; 1M NaCl, pH 9,2) (5).  
775 The supernatant was ultra-centrifuged 2 h at 44,000 x g at 4 °C and DNA was extracted from the  
776 pellet using a bead-beating and phenol/chloroform/isoamylalcohol based protocol (6). DNA was  
777 resuspended in 30  $\mu$ L of DEPC treated water. Two extractions were performed per sample and the  
778 resulting DNA was combined. DNA concentration was measured using the Qubit 1x dsDNA HS  
779 Assay Kit (Thermo Fisher Scientific) and Qubit 4 Fluorometer (Thermo Fisher Scientific). 10 mL  
780 of the cell extraction buffer was used as a negative control for DNA extraction.

781  
782  
783 Approximately 5-15 ng of DNA were shared with a E220 Focused-ultrasonicator (Covaris® Inc.,  
784 MA, USA), targeting 300-400 fragment size, and used to prepare the metagenomic libraries. The  
785 libraries were constructed using the NEBNext® ultra II DNA library prep kit for Illumina and  
786 the NEBNext® primer set 1 (Dual index, New England BioLabs, UK) with three modifications.  
787 1) the primer adapters were diluted 1:50 v/v, 2) the primers were diluted 1:2 v/v and 3) a second  
788 cleaning step was performed after PCR amplification. Purification and size selection were  
789 conducted using magnetic beads Agencourt® AMPure® XP (Beckman-Coulter, MA, USA).  
790 Inserts between 400 and 500 bp were kept and their quality evaluated using a Fragment Analyzer™  
791 (Advanced Analytical, IA, USA). Library concentration was measured with the Qubit 1x dsDNA  
792 HS Assay Kit and Qubit 4 Fluorometer. The metagenomic libraries were sequenced on an Illumina  
793 HiSeq 2500 (Illumina, CA, USA) using the HiSeq Rapid SBS Kit v2 (500 cycles, Illumina, CA,  
794 USA) and loading 12 pM including 1% v/v PhiX.

### 795 **M7. Metagenome assembly, binning and annotation**

796 HiSeq reads were quality filtered using BBduk (<https://sourceforge.net/projects/bbmap/>) and  
797 sickle (<https://github.com/najoshi/sickle>). metaSPADES 3.13 (7) was used to assemble the reads  
798 and the resulting scaffolds were filtered for length  $\geq$  1000 bp for gene prediction using Prodigal  
799 (8) in meta mode and annotation using Diamond version 0.9.9 (9) against the UniRef100 database  
800 (10) with e-value cut-off of 1E-5. Scaffold coverages were calculated by mapping reads using  
801 Bowtie2 in sensitive mode (11). Genomes were binned using abawaca  
802 ([github.com/CK7/abawaca](https://github.com/CK7/abawaca)), ESOM (12) and MaxBin2 (13), and the resulting bins were  
803 aggregated using DAS Tool (14). Each genomic bin was manually curated using coverage, gene-  
804 based taxonomy and GC content information for each scaffold. ra2 (15) was used to fix assembly  
805 errors in all binned scaffolds. CheckM (16) was used to estimate the quality of the bins and only  
806 high quality bins with completeness >75% and contamination <15% were considered for further  
807

808 analysis. For all high quality genomes, GTDB-Tk classify\_wf (17) was used for a broad taxonomic  
809 classification and *in situ* genome replication measures (iRep) (18) were calculated using --mm 3  
810 flag after mapping the reads to scaffolds with Bowtie2 (19). Further functional and metabolic  
811 capacities of high quality genomes and metagenomes were determined using METABOLIC (20).  
812 METABOLIC output was further expanded upon using hidden-markov-model (HMM) search  
813 results for the archaeal amoA protein (HMMER v3.2 (<http://hmmer.org/>), -Z 47079205 -E 1000)  
814 and other genes previously annotated using the UniREF100 database (10). Relative abundances of  
815 key metabolic genes were calculated by identifying scaffolds carrying the gene in question,  
816 summing up their coverages and finally normalizing the summed coverage with the sequencing  
817 depth of each respective sample.  
818

819 **Supplementary Results and Discussion**

820

821 **Extended pangenome analysis**

822 Notably, none of the eight Thaumarchaeota genomes contained CRISPR arrays with more than  
823 one spacer and only ABT-LB2 contained a putative *cas* gene. Similarly no Cas gene was found in  
824 *N. franklandus*, *N. oleophilus* and *N. exaquare*, and one Cas gene was found in *N. arcticus*. Only  
825 *N. exaquare* contained an evidence level 4 CRISPR array with 5 spacers (**Table S11**). The lack of  
826 CRISPR-Cas systems in these environments could be due to the lower presence of  
827 *Thaumarchaeota* targeting viruses in these environments and/or be coupled with slow growth rates  
828 rendering the CRISPR-Cas system immune response ineffective (21).

829

830 Electron transfer flavoprotein fixABCX genes were found only amongst the ABT genomes and  
831 not in any of *Ca. Nitrosocosmici* (**Table S11**). These genes are reported to be involved in the  
832 electron bifurcation in diazotrophs (22), but are also found in many non-diazotrophic *Archaea*  
833 (23), where their function is yet to be determined.

834

835 No S-layer protein slp1 was found in any of the ABT nor other *Ca. Nitrosocosmici*. The presence  
836 of Hexuronic acid methyltransferase AgIP, which is involved in the pathway of S-layer biogenesis,  
837 suggests that there may exist an alternative pathway for S-layer production. This could provide  
838 additional protection against harsh desert environments for the ABT genomes (24).

839

840 **Supplementary Figures and Tables**

841

842 **Table S1:** Sampling information, temperature and relative humidity below and beside boulders  
 843 were measured using OBO U23 pro temperature/relative humidity data logger at the time of  
 844 sampling.

845

| Site     | Location Name | Longitude | Latitude  | Altitude (m above sea level) | Temp - Below (°C) | Temp - Beside (°C) | Relative Humidity - Below (%) | Relative Humidity - Beside (%) | Collection Time (+/- 15 min) | Collection Date |
|----------|---------------|-----------|-----------|------------------------------|-------------------|--------------------|-------------------------------|--------------------------------|------------------------------|-----------------|
| <b>Y</b> | Yungay        | -69.99927 | -24.08663 | 1067                         | 22.29             | 33.55              | 31.81                         | 21.24                          | 11:00:00 AM                  | 10/3/2019       |
| <b>M</b> | Maria Elena   | -69.72428 | -22.26319 | 1318                         | 18.6              | 14.3               | 32.6                          | 68.4                           | 8:30:00 AM                   | 13/3/2019       |
| <b>L</b> | Lomas Bayas   | -69.60378 | -23.39321 | 1521                         | 36.25             | 37.53              | 11.91                         | 13.71                          | 12:30:00 PM                  | 13/3/2019       |

846

847



848 **Table S2. Metagenome library information.** DNA extracts from MB6, MC3, YB2 and YB5  
 849 contained measurable DNA (see **Figure S1**) however, failed in library preparation.

850

851

| Library | Reads (bp) | Assembly size (bp) | # scaffolds | # scaffolds $\geq 1000$ b | N50 (scaffolds $\geq 1000$ bp by length) | Sequencing depth | NCBI Accession ID |
|---------|------------|--------------------|-------------|---------------------------|------------------------------------------|------------------|-------------------|
| LB2     | 22,130,842 | 303,328,226        | 529,525     | 53,921                    | 748                                      | 9,768,467,534    | XXXXXXX           |
| LB3     | 31,273,647 | 388,980,799        | 619,007     | 73,975                    | 934                                      | 13,479,472,613   | XXXXXXX           |
| LB5     | 42,100,542 | 27,9268,968        | 502,503     | 46,030                    | 644                                      | 18,239,942,017   | XXXXXXX           |
| LC2     | 41,952,484 | 390,674,555        | 678,127     | 74,711                    | 1,058                                    | 16,737,394,618   | XXXXXXX           |
| LC3     | 20,973,878 | 385,836,147        | 692,036     | 72,209                    | 820                                      | 9,268,440,081    | XXXXXXX           |
| LC5     | 36,938,861 | 498,167,674        | 1,001,606   | 80,101                    | 660                                      | 15,452,539,821   | XXXXXXX           |
| MB1     | 50,912,651 | 397,090,821        | 724,094     | 64,247                    | 606                                      | 21,951,582,505   | XXXXXXX           |
| MB3     | 13,796,379 | 325,366,862        | 602,775     | 55,520                    | 621                                      | 5,836,722,551    | XXXXXXX           |
| MB4     | 36,370,037 | 490,933,896        | 960,960     | 74,205                    | 572                                      | 16,170,303,555   | XXXXXXX           |
| YB1     | 15,371,532 | 295,824,573        | 499,610     | 54,472                    | 721                                      | 6,539,418,086    | XXXXXXX           |
| YB3     | 27,738,528 | 335,124,123        | 571,894     | 58,118                    | 693                                      | 12,052,827,536   | XXXXXXX           |

852

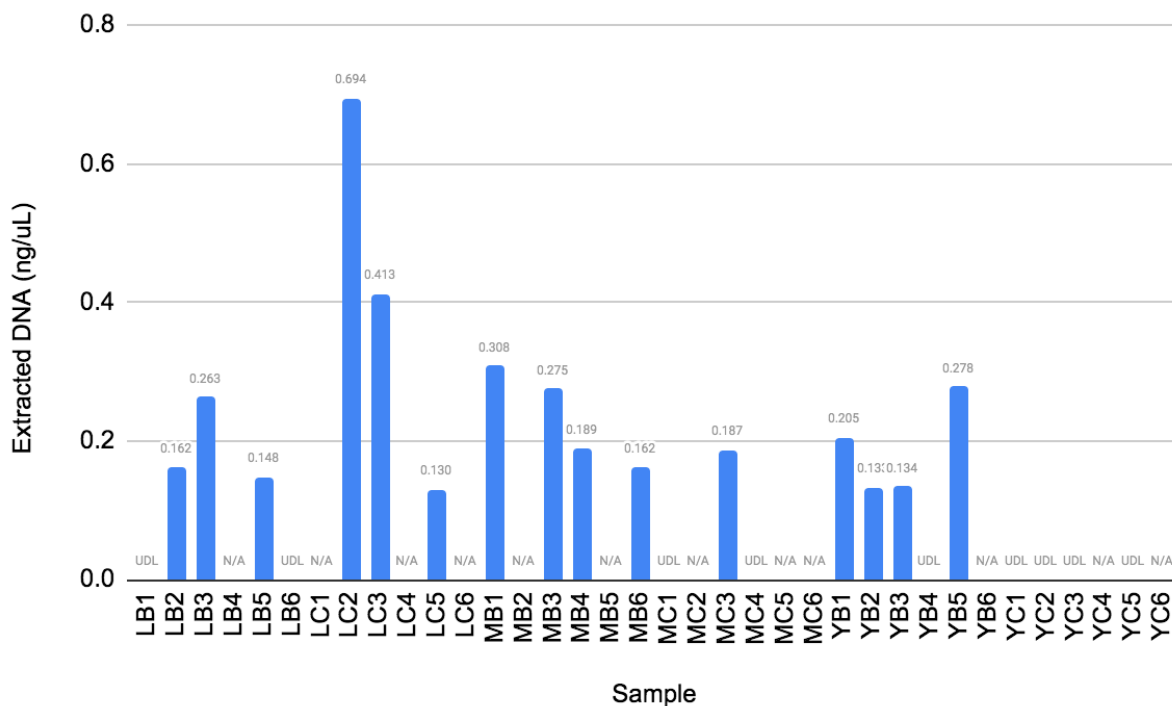

853  
854 **Figure S1. DNA extraction results.** UDL (under detection limit) indicates extraction was  
855 attempted but resulted in DNA amount below detection limit (0.01 ng/uL) and N/A indicates no  
856 extraction was attempted.

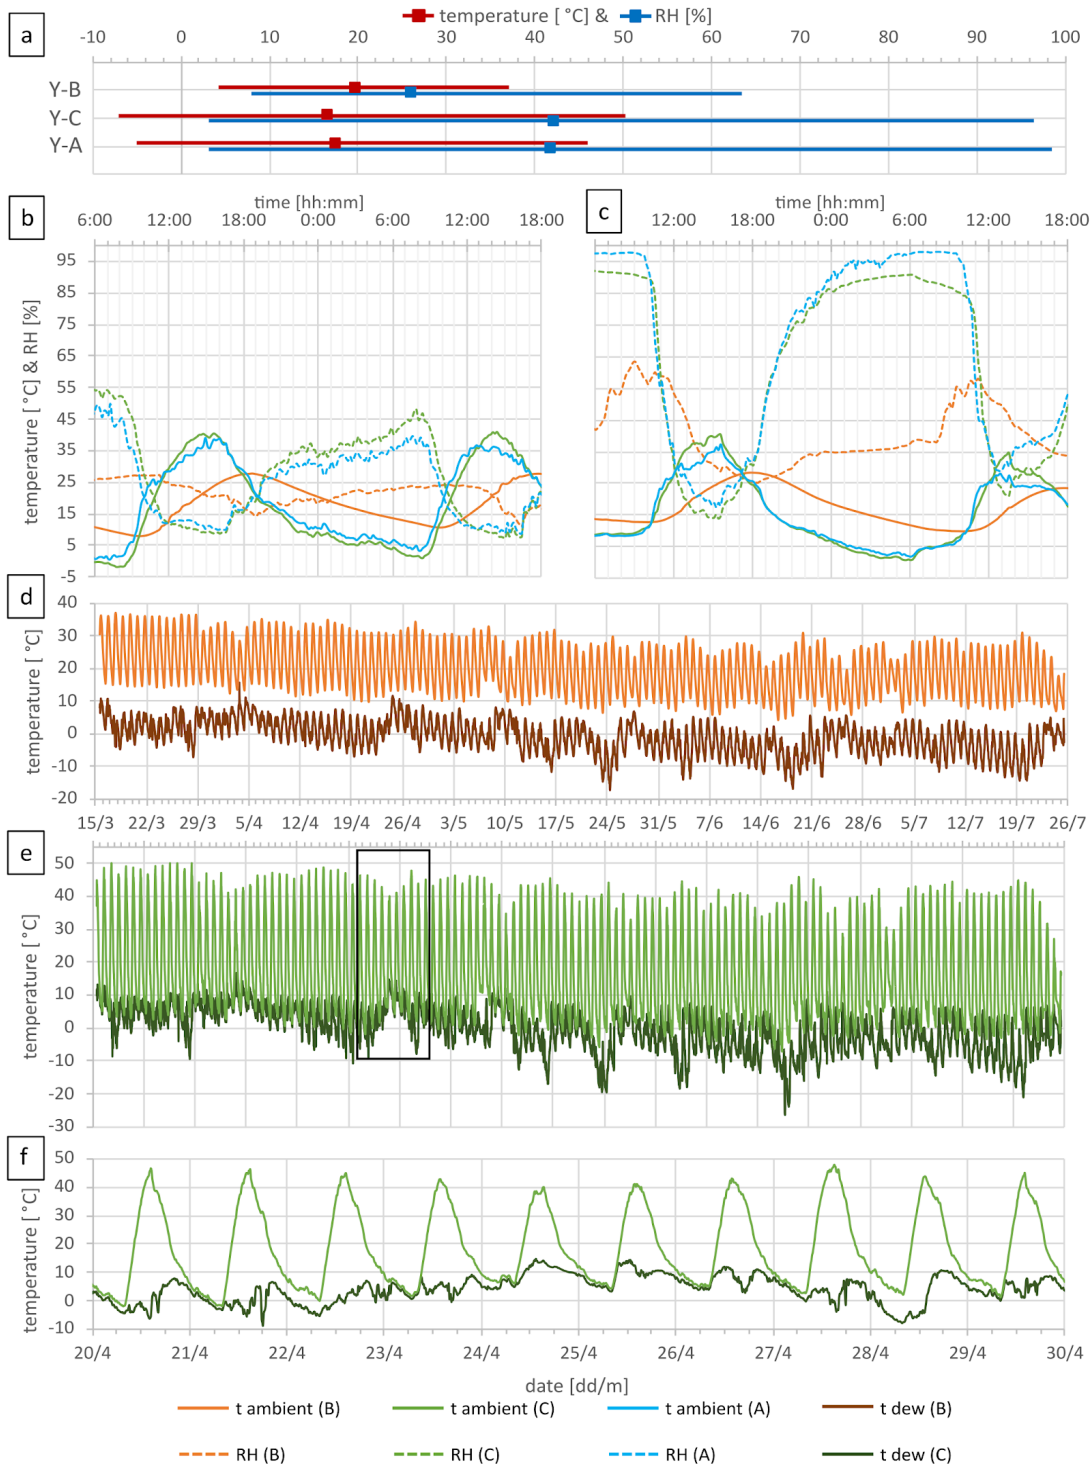

857  
858  
859  
860  
861  
862

**Figure S2. Extended field measurements of temperature and relative humidity (RH) for Y-below boulder (B), control (C) and in 1 m above ground (A).** a) Mean temperature and RH (square) and range (bar). b) Temperature and RH during a dry diurnal cycle; c) Temperature and RH during a moist diurnal cycle. d) Ambient temperature and calculated dew point temperature below boulder (B) during the full 130 days of recording. e) Ambient temperature and calculated

863 dew point temperature beside boulder (control) during the full 130 days of recording, black  
864 rectangle is zoomed in panel f).  
865

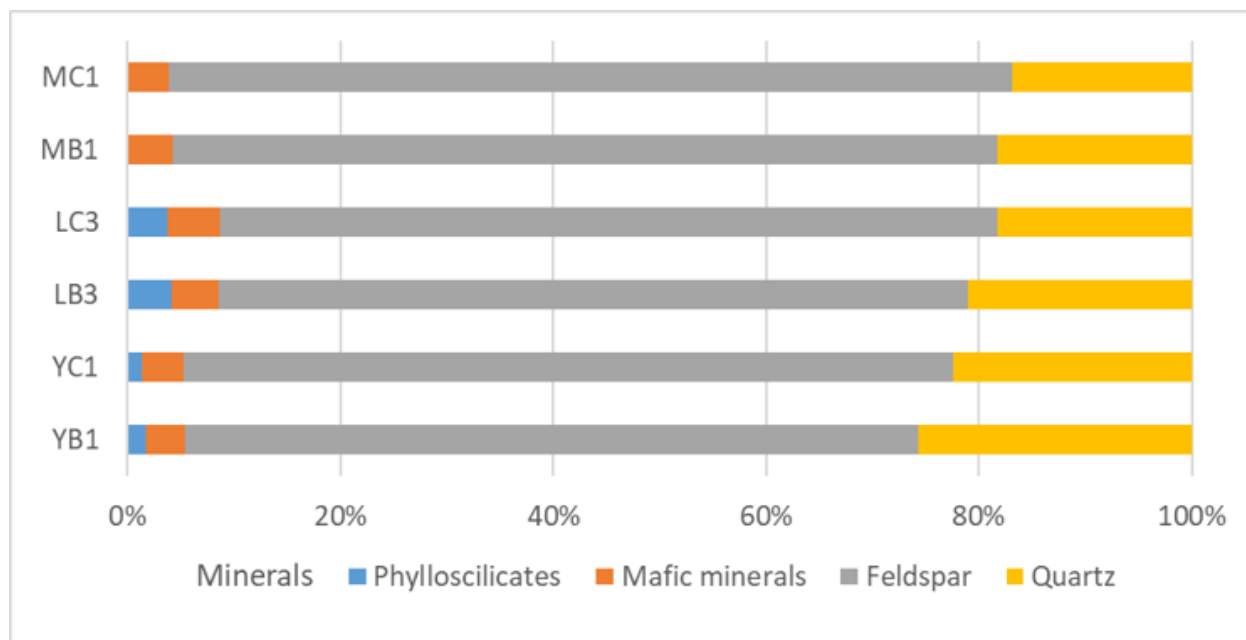

866  
867 **Figure S3. Mineral composition determined using XRD.**

a)

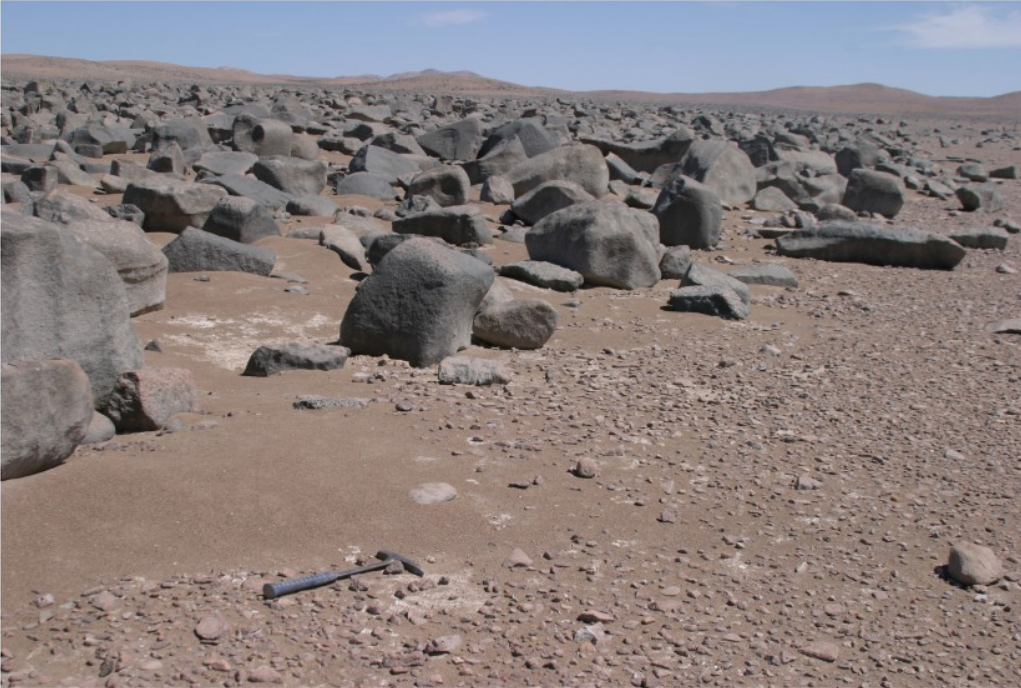

b)

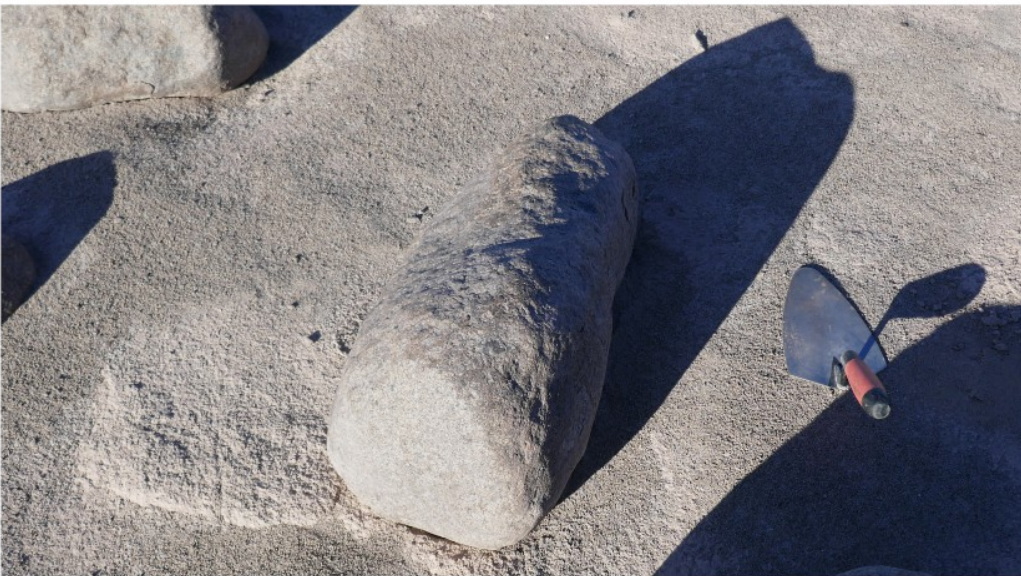

868  
869 **Figure S4. Atacama Boulder Fields.** a) Yungay Valley boulder field. b) An example of the  
870 boulders chosen for sampling.

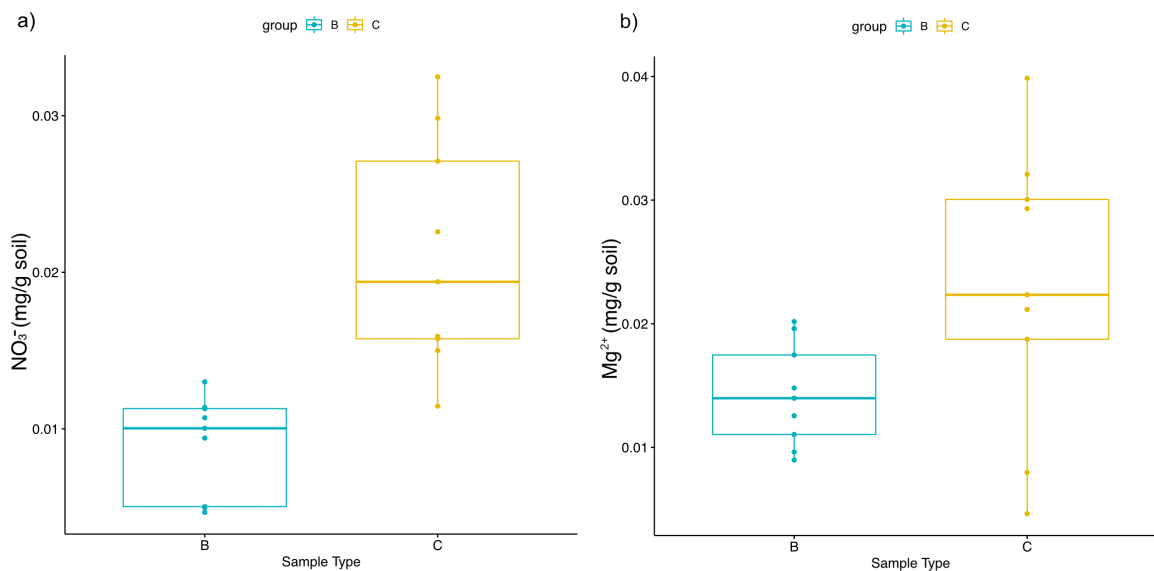

871  
872 **Figure S5. Comparison of a) nitrate and b) magnesium ion concentrations between B and C**  
873 **sample types.** Plots were visualized using "ggpubr" package in R.

874

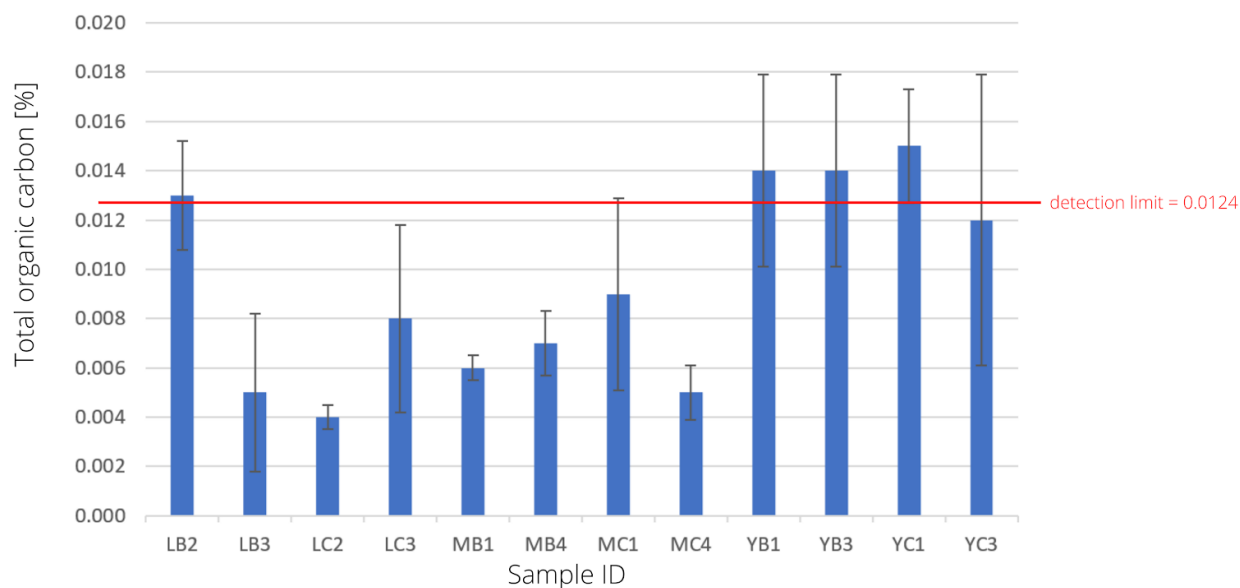

875

876

877

878

**Figure S6. Total Organic Carbon (TOC) content [wt%] per sample.** All values were below the limit of quantitation value 0.02962 wt% and very close to or below the limit of detection 0.0124 wt%.

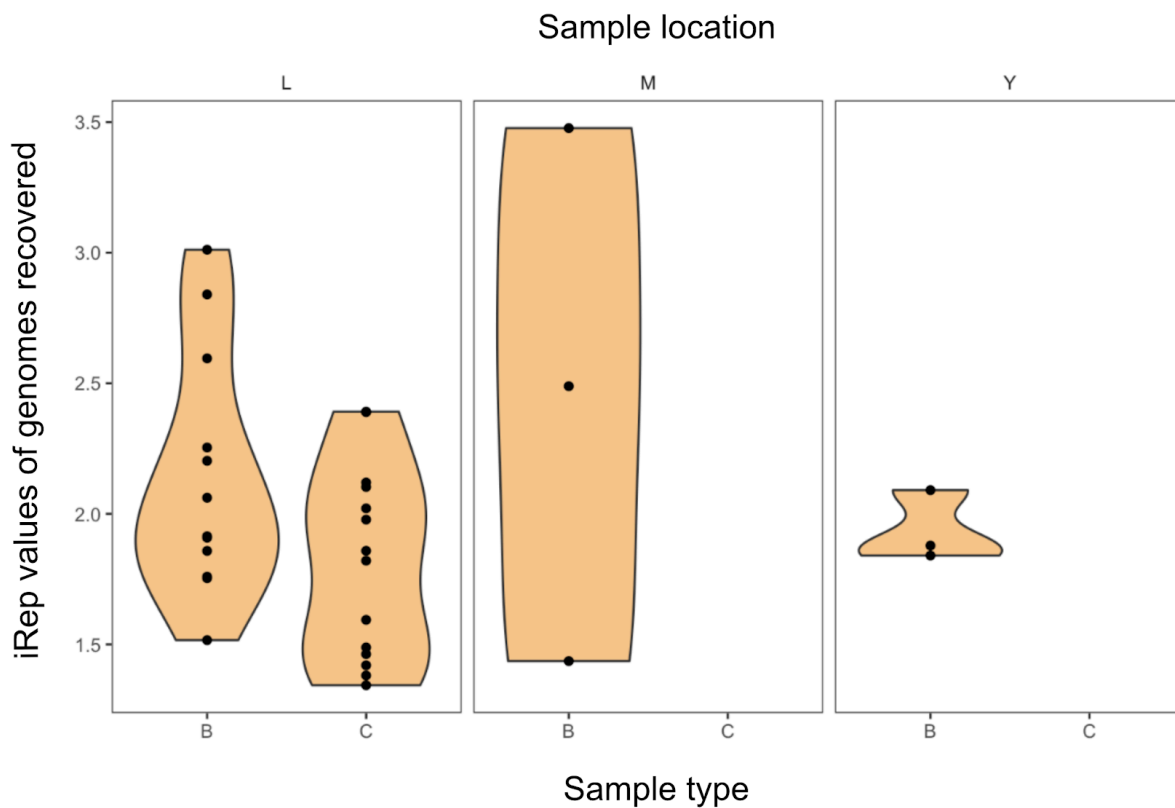

879  
880  
881  
882  
883

**Figure S7. calculated iRep values of genomes of sample type (B and C) and sample sites (L, M and Y). Plot was visualized using ggplot2 (25)**



Tree scale: 1

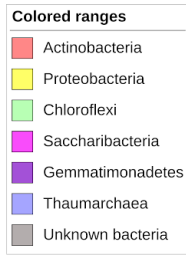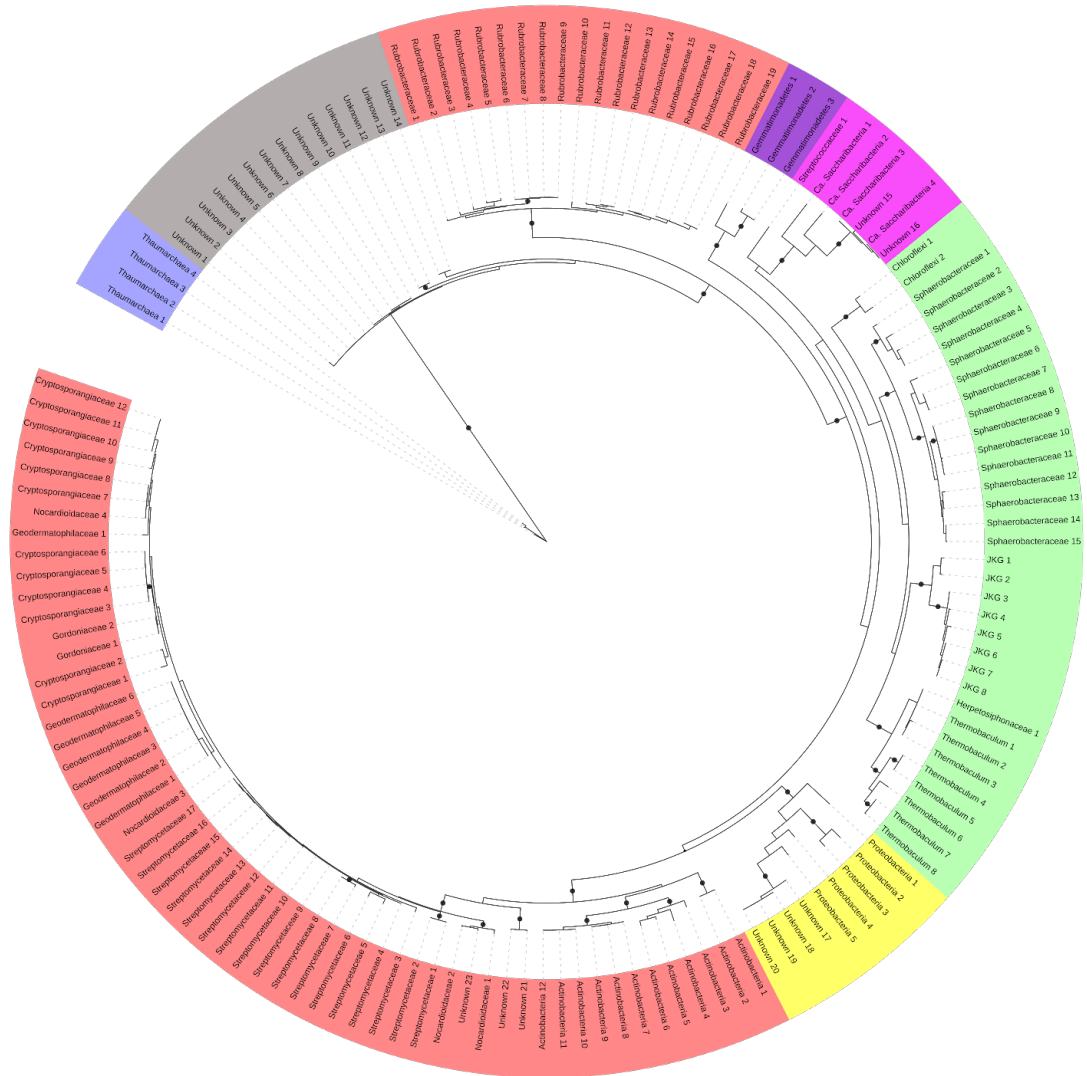

884  
 885 **Figure S8. Full phylogenetic tree of all recovered rpS3 gene clusters.** Color ranges refer to  
 886 phyla level classification, leaf labels refer to taxonomic resolution down to family level based on  
 887 BLAST (26) results against UniRef100 (10). Strongly supported branches as described in the  
 888 Methods section are indicated with black dots.

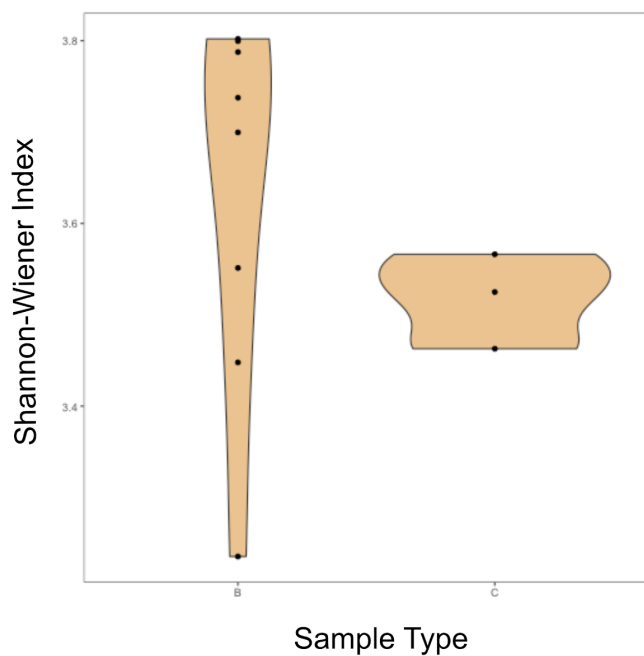

889  
890 **Figure S9. Shannon-Wiener index of each metagenome.** Indices were calculated based on  
891 normalized ribosomal protein S3 (rpS3) abundances. Plot was visualized using ggplot2 (25).  
892

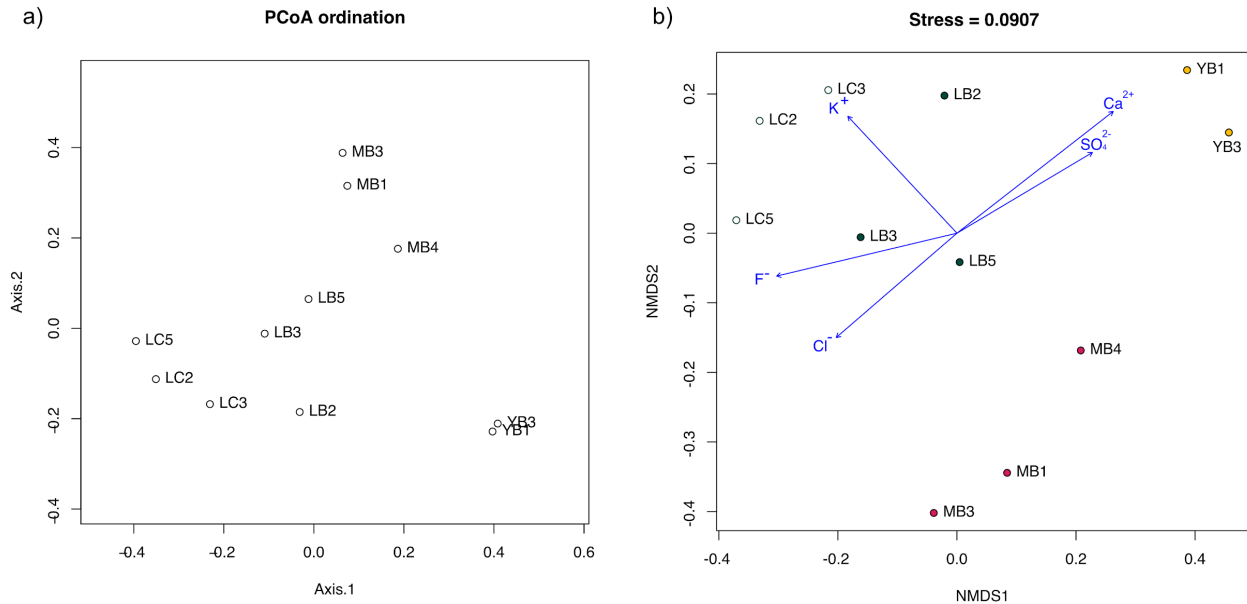

893  
894 **Figure S10. a) PCoA and b) NMDS ordination plots of metagenomes based on rpS3**  
895 **abundances.** Bray-Curtis distance matrix of normalized abundances of rpS3 taxa across all  
896 metagenomes were calculated and used as input for both figures. For NMDS, ion concentration  
897 meta data was added and the vectors were fitted with the ordination. Blue arrows represent fitted  
898 ion species with a p-value less than 0.1. Both figures were generated using R.

Tree scale: 0.1

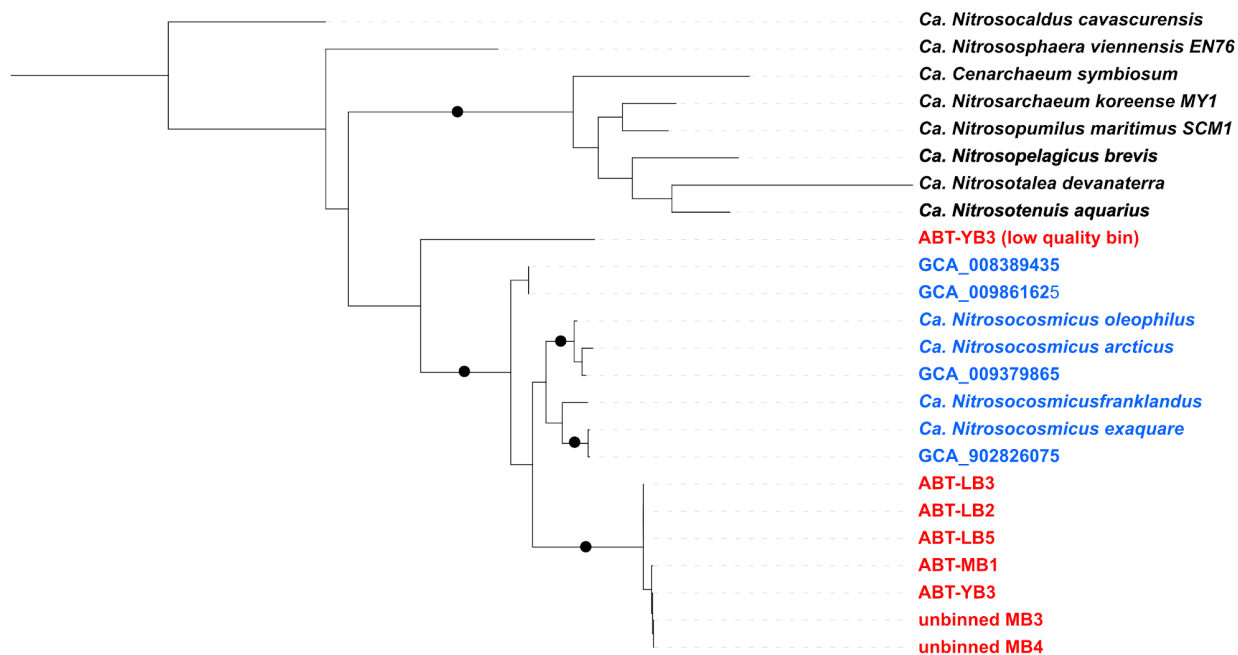

899  
900 **Figure S11.** Tree of all *amoA* sequences from this study (red), *amoAs* from *Ca. Nitrosocosmicus*  
901 (Blue) and other representative Thaumarchaea sequences (Black). Strongly supported branches as  
902 described in the M&M section are indicated with black dots.  
903  
904  
905  
906

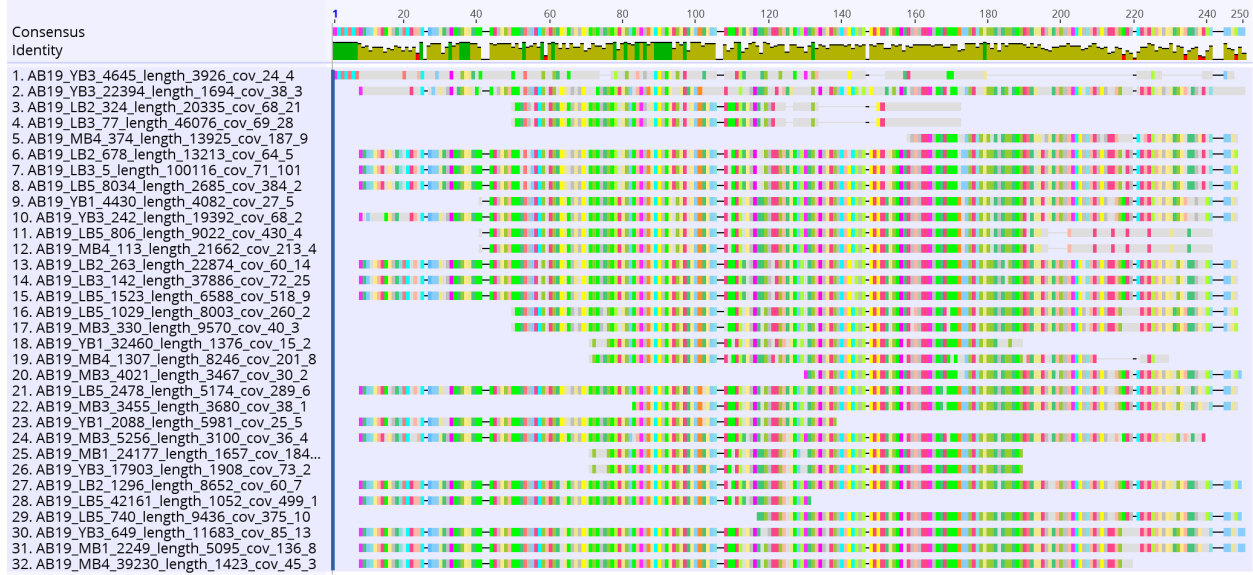

907  
908

909  
910  
911

**Figure S12. Alignments of 32 aquaporins recovered across all samples.** Visualization using the Geneious software. Sequences 1-4 show a high level of sequence divergence, while the rest show truncation at both ends despite most being located mid scaffold.

912

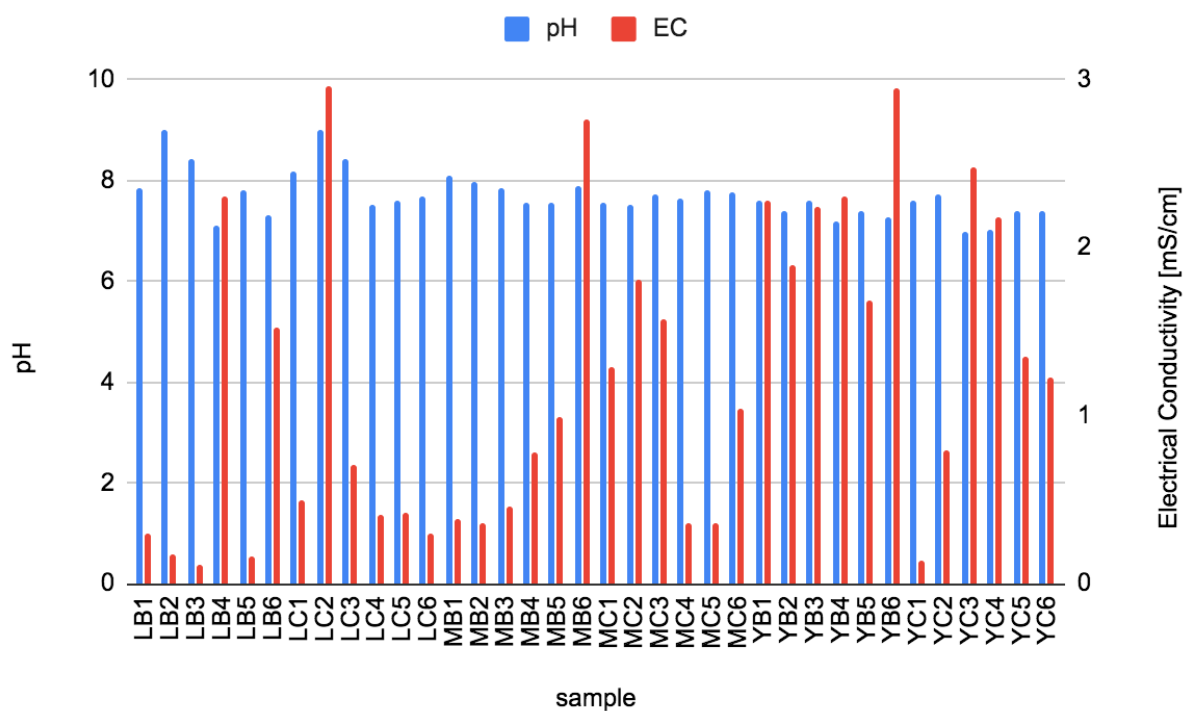

913

914

**Figure S13. pH and electrical conductivity (EC) of each sample.**

915 **Tables S3 - S14 are available as a separate Excel file:**

916

917 **Table S3. Statistics and meta-data of the reference genomes used for comparative genomics.**

918

919 **Table S4. Genome statistics of high quality genomes.** High quality genomes were determined  
920 using CheckM completeness > 75 % and contamination < 15 %. CheckM(16) output  
921 (Completeness, contamination, GC std, # ambiguous bases, Genome size, Longest Contig, N50  
922 (scaffolds), Mean scaffold length, # contigs, # scaffolds, # predicted genes, Longestscaffold, GC,  
923 N50 (contigs), Coding density, Mean contig length) are accompanied by iRep value (18)) for  
924 genomes whose iRep values could be calculated, rpS3 taxa based on BLAST(26) results against  
925 UniRef100 database (10), gtdb-tk classification (17) using “classify\_wf”.

926

927 **Table S5. Normalized abundances of all rpS3 taxa across all samples.** Column 1 corresponds  
928 to the scaffold containing the centroid of each rpS3 cluster, which was then used to calculate the  
929 normalized abundance of each rpS3 cluster (taxa) across all samples.

930

931 **Table S6. ANOVA p-values of all rpS3 taxa.** For all 147 rpS3 taxa ANOVA tests were performed  
932 between Boulder and Control sample groups (B x C), YB and MB samples (YB x MB), YB and  
933 LB samples (YB x LB), and LB and MB samples (LB x MB)

934

935 **Table S7. METABOLIC output of metagenomes.** Presence, count and gene ID of all the  
936 predicted metabolic genes found across the metagenome.

937

938 **Table S8. METABOLIC output of all high quality genomes.** Presence, count and gene ID of  
939 all the predicted metabolic genes found across the metagenome.

940

941 **Table S9. Ammonification genes.**

942

943 **Table S10. Orthologous protein clusters with GO (27,28) and Swiss-Prot(29) annotation.**  
944 Clusters were determined using Orthovenn2(30). In orange are clusters with putative functions  
945 associated with stress response and in yellow are clusters with putative functions associated with  
946 nitrogen metabolism.

947

948 **Table S11. List of amoABCX genes, 4HB/3HP pathway genes, TCA cycle, gluconeogenesis,  
949 pentose phosphate pathway and other notable genes for each ABT genomes.**

950

951 **Table S12. Singletons of LB3, MB4, YB3 genomes.** Singletons were identified using  
952 Orthovenn2(30) and annotated by BLASTing (26,30) against UniRef100 database (10)

953

954 **Table S13. List of NCBI genomes used for phylogenomic tree construction.** NCBI genomes  
955 classified as Thaumarchaeota on 30th May 2020, filtered using CheckM completeness >50 % and  
956 contamination < 5%.

957

958 **Table S14. Ion chromatography raw data in mg/g soil.**

959

960

961  
962  
963  
964  
965  
966  
967  
968  
969  
970

**Additional File:**

**Additional File 1:** Newick treefile of *Ca. Nitrosodesertus* and NCBI genomes annotated as *Thaumarchaeota*



- 971  
972 **Supplementary references**
- 973 1. Lawrence MG. The Relationship between Relative Humidity and the Dewpoint Temperature  
974 in Moist Air: A Simple Conversion and Applications. *Bull Am Meteorol Soc.* 2005 Feb  
975 1;86(2):225–34.
- 976 2. Oksanen J, Blanchet FG, Kindt R, Legendre P, Minchin P. The vegan package: Community  
977 Ecology Package. R package version 2.0--2. 2011 Jan 1;
- 978 3. Core Team R, Others. R: A language and environment for statistical computing. Vienna,  
979 Austria: R Foundation for Statistical Computing. Available. 2013;
- 980 4. Schulze-Makuch D, Wagner D, Kounaves SP, Mangelsdorf K, Devine KG, de Vera J-P, et  
981 al. Transitory microbial habitat in the hyperarid Atacama Desert. *Proc Natl Acad Sci U S A.*  
982 2018 Mar 13;115(11):2670–5.
- 983 5. Narayan A, Jain K, Shah AR, Madamwar D. An efficient and cost-effective method for  
984 DNA extraction from athalassohaline soil using a newly formulated cell extraction buffer. *3*  
985 *Biotech.* 2016 Jun;6(1):62.
- 986 6. Improved protocol for the simultaneous extraction and column-based separation of DNA  
987 and RNA from different soils. *J Microbiol Methods.* 2011 Mar 1;84(3):406–12.
- 988 7. Nurk S, Meleshko D, Korobeynikov A, Pevzner PA. metaSPAdes: a new versatile  
989 metagenomic assembler. *Genome Res.* 2017 May;27(5):824–34.
- 990 8. Hyatt D, Chen G-L, Locascio PF, Land ML, Larimer FW, Hauser LJ. Prodigal: prokaryotic  
991 gene recognition and translation initiation site identification. *BMC Bioinformatics.* 2010  
992 Mar 8;11:119.
- 993 9. Buchfink B, Xie C, Huson DH. Fast and sensitive protein alignment using DIAMOND  
994 [Internet]. Vol. 12, *Nature Methods.* 2015. p. 59–60. Available from:  
995 <http://dx.doi.org/10.1038/nmeth.3176>
- 996 10. Suzek BE, Huang H, McGarvey P, Mazumder R, Wu CH. UniRef: comprehensive and non-  
997 redundant UniProt reference clusters. *Bioinformatics.* 2007 May 15;23(10):1282–8.
- 998 11. Langdon WB. Performance of genetic programming optimised Bowtie2 on genome  
999 comparison and analytic testing (GCAT) benchmarks. *BioData Min.* 2015 Jan 8;8(1):1.
- 1000 12. Dick GJ, Andersson AF, Baker BJ, Simmons SL, Thomas BC, Yelton AP, et al.  
1001 Community-wide analysis of microbial genome sequence signatures. *Genome Biol.* 2009  
1002 Aug 21;10(8):R85.
- 1003 13. Wu Y-W, Simmons BA, Singer SW. MaxBin 2.0: an automated binning algorithm to  
1004 recover genomes from multiple metagenomic datasets. *Bioinformatics.* 2016 Feb  
1005 15;32(4):605–7.

- 1006 14. Sieber CMK, Probst AJ, Sharrar A, Thomas BC, Hess M, Tringe SG, et al. Recovery of  
1007 genomes from metagenomes via a dereplication, aggregation and scoring strategy [Internet].  
1008 Vol. 3, Nature Microbiology. 2018. p. 836–43. Available from:  
1009 <http://dx.doi.org/10.1038/s41564-018-0171-1>
- 1010 15. Brown CT, Hug LA, Thomas BC, Sharon I, Castelle CJ, Singh A, et al. Unusual biology  
1011 across a group comprising more than 15% of domain Bacteria [Internet]. Vol. 523, Nature.  
1012 2015. p. 208–11. Available from: <http://dx.doi.org/10.1038/nature14486>
- 1013 16. Parks DH, Imelfort M, Skennerton CT, Hugenholtz P, Tyson GW. CheckM: assessing the  
1014 quality of microbial genomes recovered from isolates, single cells, and metagenomes.  
1015 Genome Res. 2015 Jul;25(7):1043–55.
- 1016 17. Chaumeil P-A, Mussig AJ, Hugenholtz P, Parks DH. GTDB-Tk: a toolkit to classify  
1017 genomes with the Genome Taxonomy Database. Bioinformatics [Internet]. 2019 Nov 15;  
1018 Available from: <http://dx.doi.org/10.1093/bioinformatics/btz848>
- 1019 18. Brown CT, Olm MR, Thomas BC, Banfield JF. Measurement of bacterial replication rates  
1020 in microbial communities [Internet]. Vol. 34, Nature Biotechnology. 2016. p. 1256–63.  
1021 Available from: <http://dx.doi.org/10.1038/nbt.3704>
- 1022 19. Langmead B, Trapnell C, Pop M, Salzberg SL. Ultrafast and memory-efficient alignment of  
1023 short DNA sequences to the human genome. Genome Biol. 2009 Mar 4;10(3):R25.
- 1024 20. Zhou Z, Tran P, Liu Y, Kieft K, Anantharaman K. METABOLIC: A scalable high-  
1025 throughput metabolic and biogeochemical functional trait profiler based on microbial  
1026 genomes [Internet]. Available from: <http://dx.doi.org/10.1101/761643>
- 1027 21. Burstein D, Sun CL, Brown CT, Sharon I, Anantharaman K, Probst AJ, et al. Major  
1028 bacterial lineages are essentially devoid of CRISPR-Cas viral defence systems. Nat  
1029 Commun. 2016 Feb 3;7:10613.
- 1030 22. Ledbetter RN, Garcia Costas AM, Lubner CE, Mulder DW, Tokmina-Lukaszewska M, Artz  
1031 JH, et al. The Electron Bifurcating FixABCX Protein Complex from *Azotobacter vinelandii*:  
1032 Generation of Low-Potential Reducing Equivalents for Nitrogenase Catalysis. Biochemistry.  
1033 2017 Aug 15;56(32):4177–90.
- 1034 23. Reji L, Francis CA. Metagenome-assembled genomes reveal unique metabolic adaptations  
1035 of a basal marine Thaumarchaeota lineage. ISME J [Internet]. 2020 May 13; Available  
1036 from: <http://dx.doi.org/10.1038/s41396-020-0675-6>
- 1037 24. Nicol GW, Hink L, Gubry-Rangin C, Prosser JI, Lehtovirta-Morley LE. Genome Sequence  
1038 of “*Nitrosocosmicus franklandus*” C13, a Terrestrial Ammonia-Oxidizing Archaeon.  
1039 Microbiol Resour Announc [Internet]. 2019 Oct 3;8(40). Available from:  
1040 <http://dx.doi.org/10.1128/MRA.00435-19>
- 1041 25. Wickham H, Chang W. ggplot2: an implementation of the grammar of graphics.(0.9. 3 edn).  
1042 See <http://ggplot2.org>. 2012;

- 1043 26. Altschul SF, Gish W, Miller W, Myers EW, Lipman DJ. Basic local alignment search tool. *J*  
1044 *Mol Biol.* 1990 Oct 5;215(3):403–10.
- 1045 27. Ashburner M, Ball CA, Blake JA, Botstein D, Butler H, Michael Cherry J, et al. Gene  
1046 Ontology: tool for the unification of biology [Internet]. Vol. 25, *Nature Genetics.* 2000. p.  
1047 25–9. Available from: <http://dx.doi.org/10.1038/75556>
- 1048 28. The Gene Ontology Consortium. The Gene Ontology Resource: 20 years and still GOing  
1049 strong. *Nucleic Acids Res.* 2019 Jan 8;47(D1):D330–8.
- 1050 29. Bairoch A, Apweiler R. The SWISS-PROT protein sequence database and its supplement  
1051 TrEMBL in 2000. *Nucleic Acids Res.* 2000 Jan 1;28(1):45–8.
- 1052 30. Xu L, Dong Z, Fang L, Luo Y, Wei Z, Guo H, et al. OrthoVenn2: a web server for whole-  
1053 genome comparison and annotation of orthologous clusters across multiple species. *Nucleic*  
1054 *Acids Res.* 2019 Jul 2;47(W1):W52–8.
- 1055
